# Supplementary material
Source: publisher site journal article supplement (https://www.spandidos-publications.com/2283/downloadSupplementary)
Supplement: Supplementary file 1 [file downloadSupplementary]

## Sheet: miRNA-gene relation
Table SIX. miRNA-gene network from the mesenchymal stem cell treatment group.
microRNA	Style	Gene symbol	Description
hsa-let-7a-5p	down	ABCB9	ATP-binding cassette, sub-family B (MDR/TAP), member 9
hsa-let-7a-5p	down	ABCC10	ATP-binding cassette, sub-family C (CFTR/MRP), member 10
hsa-let-7a-5p	down	ABCC5	ATP-binding cassette, sub-family C (CFTR/MRP), member 5
hsa-let-7a-5p	down	ABL2	v-abl Abelson murine leukemia viral oncogene homolog 2
hsa-let-7a-5p	down	ACER2	alkaline ceramidase 2
hsa-let-7a-5p	down	ACP1	acid phosphatase 1, soluble
hsa-let-7a-5p	down	ACSL6	acyl-CoA synthetase long-chain family member 6
hsa-let-7a-5p	down	ACVR2A	activin A receptor, type IIA
hsa-let-7a-5p	down	ADRBK2	adrenergic, beta, receptor kinase 2
hsa-let-7a-5p	down	AKT2	v-akt murine thymoma viral oncogene homolog 2
hsa-let-7a-5p	down	AMOT	angiomotin
hsa-let-7a-5p	down	AMT	aminomethyltransferase
hsa-let-7a-5p	down	AP4E1	adaptor-related protein complex 4, epsilon 1 subunit
hsa-let-7a-5p	down	ATP2A2	ATPase, Ca++ transporting, cardiac muscle, slow twitch 2
hsa-let-7a-5p	down	B3GAT3	beta-1,3-glucuronyltransferase 3 (glucuronosyltransferase I)
hsa-let-7a-5p	down	B3GNT7	UDP-GlcNAc:betaGal beta-1,3-N-acetylglucosaminyltransferase 7
hsa-let-7a-5p	down	BCAT1	branched chain amino-acid transaminase 1, cytosolic
hsa-let-7a-5p	down	CANT1	calcium activated nucleotidase 1
hsa-let-7a-5p	down	CBL	Cbl proto-oncogene, E3 ubiquitin protein ligase
hsa-let-7a-5p	down	CD86	CD86 molecule
hsa-let-7a-5p	down	CDC25A	cell division cycle 25 homolog A (S. pombe)
hsa-let-7a-5p	down	CDC34	cell division cycle 34 homolog (S. cerevisiae)
hsa-let-7a-5p	down	CDKN1A	cyclin-dependent kinase inhibitor 1A (p21, Cip1)
hsa-let-7a-5p	down	CHRD	chordin
hsa-let-7a-5p	down	COL4A2	collagen, type IV, alpha 2
hsa-let-7a-5p	down	COL4A6	collagen, type IV, alpha 6
hsa-let-7a-5p	down	CPEB1	cytoplasmic polyadenylation element binding protein 1
hsa-let-7a-5p	down	CTNS	cystinosin, lysosomal cystine transporter
hsa-let-7a-5p	down	CYP19A1	cytochrome P450, family 19, subfamily A, polypeptide 1
hsa-let-7a-5p	down	DLST	dihydrolipoamide S-succinyltransferase (E2 component of 2-oxo-glutarate complex)
hsa-let-7a-5p	down	DTX4	deltex homolog 4 (Drosophila)
hsa-let-7a-5p	down	DUSP16	dual specificity phosphatase 16
hsa-let-7a-5p	down	E2F2	E2F transcription factor 2
hsa-let-7a-5p	down	ESPL1	extra spindle pole bodies homolog 1 (S. cerevisiae)
hsa-let-7a-5p	down	FAS	Fas (TNF receptor superfamily, member 6)
hsa-let-7a-5p	down	FASLG	Fas ligand (TNF superfamily, member 6)
hsa-let-7a-5p	down	FGF11	fibroblast growth factor 11
hsa-let-7a-5p	down	FZD4	frizzled family receptor 4
hsa-let-7a-5p	down	GAB2	GRB2-associated binding protein 2
hsa-let-7a-5p	down	GALC	galactosylceramidase
hsa-let-7a-5p	down	GALE	UDP-galactose-4-epimerase
hsa-let-7a-5p	down	GATM	glycine amidinotransferase (L-arginine:glycine amidinotransferase)
hsa-let-7a-5p	down	GDF6	growth differentiation factor 6
hsa-let-7a-5p	down	GNPTAB	N-acetylglucosamine-1-phosphate transferase, alpha and beta subunits
hsa-let-7a-5p	down	HBEGF	heparin-binding EGF-like growth factor
hsa-let-7a-5p	down	HMGA2	high mobility group AT-hook 2
hsa-let-7a-5p	down	HTR1E	5-hydroxytryptamine (serotonin) receptor 1E, G protein-coupled
hsa-let-7a-5p	down	HTR4	5-hydroxytryptamine (serotonin) receptor 4, G protein-coupled
hsa-let-7a-5p	down	ICOS	inducible T-cell co-stimulator
hsa-let-7a-5p	down	IGF1	insulin-like growth factor 1 (somatomedin C)
hsa-let-7a-5p	down	IGF1R	insulin-like growth factor 1 receptor
hsa-let-7a-5p	down	IKBKE	inhibitor of kappa light polypeptide gene enhancer in B-cells, kinase epsilon
hsa-let-7a-5p	down	IL10	interleukin 10
hsa-let-7a-5p	down	IL13	interleukin 13
hsa-let-7a-5p	down	IRS2	insulin receptor substrate 2
hsa-let-7a-5p	down	ITGB3	integrin, beta 3 (platelet glycoprotein IIIa, antigen CD61)
hsa-let-7a-5p	down	ITGB8	integrin, beta 8
hsa-let-7a-5p	down	LIMK2	LIM domain kinase 2
hsa-let-7a-5p	down	LPGAT1	lysophosphatidylglycerol acyltransferase 1
hsa-let-7a-5p	down	MAP3K1	mitogen-activated protein kinase kinase kinase 1, E3 ubiquitin protein ligase
hsa-let-7a-5p	down	MAP4K3	mitogen-activated protein kinase kinase kinase kinase 3
hsa-let-7a-5p	down	MDM4	Mdm4 p53 binding protein homolog (mouse)
hsa-let-7a-5p	down	MFSD8	major facilitator superfamily domain containing 8
hsa-let-7a-5p	down	MGAT3	mannosyl (beta-1,4-)-glycoprotein beta-1,4-N-acetylglucosaminyltransferase
hsa-let-7a-5p	down	MGLL	monoglyceride lipase
hsa-let-7a-5p	down	MLLT4	myeloid/lymphoid or mixed-lineage leukemia (trithorax homolog, Drosophila); translocated to, 4
hsa-let-7a-5p	down	NDST3	N-deacetylase/N-sulfotransferase (heparan glucosaminyl) 3
hsa-let-7a-5p	down	NKD1	naked cuticle homolog 1 (Drosophila)
hsa-let-7a-5p	down	NME4	non-metastatic cells 4, protein expressed in
hsa-let-7a-5p	down	NME6	non-metastatic cells 6, protein expressed in (nucleoside-diphosphate kinase)
hsa-let-7a-5p	down	NUP98	nucleoporin 98kDa
hsa-let-7a-5p	down	P2RX1	purinergic receptor P2X, ligand-gated ion channel, 1
hsa-let-7a-5p	down	PARD6B	par-6 partitioning defective 6 homolog beta (C. elegans)
hsa-let-7a-5p	down	PBX1	pre-B-cell leukemia homeobox 1
hsa-let-7a-5p	down	PBX3	pre-B-cell leukemia homeobox 3
hsa-let-7a-5p	down	PCYT1B	phosphate cytidylyltransferase 1, choline, beta
hsa-let-7a-5p	down	PIGA	phosphatidylinositol glycan anchor biosynthesis, class A
hsa-let-7a-5p	down	PLA2G3	phospholipase A2, group III
hsa-let-7a-5p	down	PLD3	phospholipase D family, member 3
hsa-let-7a-5p	down	PLXNC1	plexin C1
hsa-let-7a-5p	down	POLR2D	polymerase (RNA) II (DNA directed) polypeptide D
hsa-let-7a-5p	down	PPP1R12B	protein phosphatase 1, regulatory subunit 12B
hsa-let-7a-5p	down	PPP2R2A	protein phosphatase 2, regulatory subunit B, alpha
hsa-let-7a-5p	down	PRKAA2	protein kinase, AMP-activated, alpha 2 catalytic subunit
hsa-let-7a-5p	down	PRKAB2	protein kinase, AMP-activated, beta 2 non-catalytic subunit
hsa-let-7a-5p	down	PRLR	prolactin receptor
hsa-let-7a-5p	down	RAB11FIP4	RAB11 family interacting protein 4 (class II)
hsa-let-7a-5p	down	RALB	v-ral simian leukemia viral oncogene homolog B (ras related; GTP binding protein)
hsa-let-7a-5p	down	RDH10	retinol dehydrogenase 10 (all-trans)
hsa-let-7a-5p	down	RDX	radixin
hsa-let-7a-5p	down	RICTOR	RPTOR independent companion of MTOR, complex 2
hsa-let-7a-5p	down	RNF5	ring finger protein 5, E3 ubiquitin protein ligase
hsa-let-7a-5p	down	RNMT	RNA (guanine-7-) methyltransferase
hsa-let-7a-5p	down	RPS6KA3	ribosomal protein S6 kinase, 90kDa, polypeptide 3
hsa-let-7a-5p	down	RRAGD	Ras-related GTP binding D
hsa-let-7a-5p	down	RRM2	ribonucleotide reductase M2
hsa-let-7a-5p	down	SCD	stearoyl-CoA desaturase (delta-9-desaturase)
hsa-let-7a-5p	down	SEC31B	SEC31 homolog B (S. cerevisiae)
hsa-let-7a-5p	down	SEMA4C	sema domain, immunoglobulin domain (Ig), transmembrane domain (TM) and short cytoplasmic domain, (semaphorin) 4C
hsa-let-7a-5p	down	SLC26A9	solute carrier family 26, member 9
hsa-let-7a-5p	down	SLC8A2	solute carrier family 8 (sodium/calcium exchanger), member 2
hsa-let-7a-5p	down	SMC1A	structural maintenance of chromosomes 1A
hsa-let-7a-5p	down	SOCS4	suppressor of cytokine signaling 4
hsa-let-7a-5p	down	SRGAP1	SLIT-ROBO Rho GTPase activating protein 1
hsa-let-7a-5p	down	SRGAP3	SLIT-ROBO Rho GTPase activating protein 3
hsa-let-7a-5p	down	STX17	syntaxin 17
hsa-let-7a-5p	down	STX3	syntaxin 3
hsa-let-7a-5p	down	TGDS	TDP-glucose 4,6-dehydratase
hsa-let-7a-5p	down	THBS1	thrombospondin 1
hsa-let-7a-5p	down	TMPRSS2	transmembrane protease, serine 2
hsa-let-7a-5p	down	TNFSF9	tumor necrosis factor (ligand) superfamily, member 9
hsa-let-7a-5p	down	TRPM6	transient receptor potential cation channel, subfamily M, member 6
hsa-let-7a-5p	down	TSC1	tuberous sclerosis 1
hsa-let-7a-5p	down	UBE2G2	ubiquitin-conjugating enzyme E2G 2
hsa-let-7a-5p	down	ULK2	unc-51-like kinase 2 (C. elegans)
hsa-let-7a-5p	down	VAV3	vav 3 guanine nucleotide exchange factor
hsa-let-7a-5p	down	XYLT1	xylosyltransferase I
hsa-let-7a-5p	down	YOD1	YOD1 OTU deubiquinating enzyme 1 homolog (S. cerevisiae)
hsa-let-7a-5p	down	ZFYVE16	zinc finger, FYVE domain containing 16
hsa-let-7i-5p	down	AASS	aminoadipate-semialdehyde synthase
hsa-let-7i-5p	down	ABCB9	ATP-binding cassette, sub-family B (MDR/TAP), member 9
hsa-let-7i-5p	down	ABCC10	ATP-binding cassette, sub-family C (CFTR/MRP), member 10
hsa-let-7i-5p	down	ABCC5	ATP-binding cassette, sub-family C (CFTR/MRP), member 5
hsa-let-7i-5p	down	ABL2	v-abl Abelson murine leukemia viral oncogene homolog 2
hsa-let-7i-5p	down	ACER2	alkaline ceramidase 2
hsa-let-7i-5p	down	AGPAT6	1-acylglycerol-3-phosphate O-acyltransferase 6 (lysophosphatidic acid acyltransferase, zeta)
hsa-let-7i-5p	down	AKT2	v-akt murine thymoma viral oncogene homolog 2
hsa-let-7i-5p	down	AMOT	angiomotin
hsa-let-7i-5p	down	APC2	adenomatosis polyposis coli 2
hsa-let-7i-5p	down	ATP2A2	ATPase, Ca++ transporting, cardiac muscle, slow twitch 2
hsa-let-7i-5p	down	B3GNT1	UDP-GlcNAc:betaGal beta-1,3-N-acetylglucosaminyltransferase 1
hsa-let-7i-5p	down	B3GNT7	UDP-GlcNAc:betaGal beta-1,3-N-acetylglucosaminyltransferase 7
hsa-let-7i-5p	down	BACE2	beta-site APP-cleaving enzyme 2
hsa-let-7i-5p	down	BCAT1	branched chain amino-acid transaminase 1, cytosolic
hsa-let-7i-5p	down	CANT1	calcium activated nucleotidase 1
hsa-let-7i-5p	down	CASK	calcium/calmodulin-dependent serine protein kinase (MAGUK family)
hsa-let-7i-5p	down	CASP3	caspase 3, apoptosis-related cysteine peptidase
hsa-let-7i-5p	down	CBL	Cbl proto-oncogene, E3 ubiquitin protein ligase
hsa-let-7i-5p	down	CCR7	chemokine (C-C motif) receptor 7
hsa-let-7i-5p	down	CD86	CD86 molecule
hsa-let-7i-5p	down	CDC14B	CDC14 cell division cycle 14 homolog B (S. cerevisiae)
hsa-let-7i-5p	down	CDC34	cell division cycle 34 homolog (S. cerevisiae)
hsa-let-7i-5p	down	CHUK	conserved helix-loop-helix ubiquitous kinase
hsa-let-7i-5p	down	CLP1	CLP1, cleavage and polyadenylation factor I subunit, homolog (S. cerevisiae)
hsa-let-7i-5p	down	CNOT2	CCR4-NOT transcription complex, subunit 2
hsa-let-7i-5p	down	COL15A1	collagen, type XV, alpha 1
hsa-let-7i-5p	down	COL24A1	collagen, type XXIV, alpha 1
hsa-let-7i-5p	down	COL4A2	collagen, type IV, alpha 2
hsa-let-7i-5p	down	COL5A2	collagen, type V, alpha 2
hsa-let-7i-5p	down	CRB2	crumbs homolog 2 (Drosophila)
hsa-let-7i-5p	down	CYP19A1	cytochrome P450, family 19, subfamily A, polypeptide 1
hsa-let-7i-5p	down	DAPK1	death-associated protein kinase 1
hsa-let-7i-5p	down	DUSP16	dual specificity phosphatase 16
hsa-let-7i-5p	down	E2F2	E2F transcription factor 2
hsa-let-7i-5p	down	ESPL1	extra spindle pole bodies homolog 1 (S. cerevisiae)
hsa-let-7i-5p	down	ETNK1	ethanolamine kinase 1
hsa-let-7i-5p	down	FGF11	fibroblast growth factor 11
hsa-let-7i-5p	down	GALE	UDP-galactose-4-epimerase
hsa-let-7i-5p	down	GALNT1	UDP-N-acetyl-alpha-D-galactosamine:polypeptide N-acetylgalactosaminyltransferase 1 (GalNAc-T1)
hsa-let-7i-5p	down	GALNT2	UDP-N-acetyl-alpha-D-galactosamine:polypeptide N-acetylgalactosaminyltransferase 2 (GalNAc-T2)
hsa-let-7i-5p	down	GDF6	growth differentiation factor 6
hsa-let-7i-5p	down	GNG5	guanine nucleotide binding protein (G protein), gamma 5
hsa-let-7i-5p	down	GNPTAB	N-acetylglucosamine-1-phosphate transferase, alpha and beta subunits
hsa-let-7i-5p	down	HBEGF	heparin-binding EGF-like growth factor
hsa-let-7i-5p	down	HMGA2	high mobility group AT-hook 2
hsa-let-7i-5p	down	HTR4	5-hydroxytryptamine (serotonin) receptor 4, G protein-coupled
hsa-let-7i-5p	down	ICOS	inducible T-cell co-stimulator
hsa-let-7i-5p	down	IGF1R	insulin-like growth factor 1 receptor
hsa-let-7i-5p	down	IKBKE	inhibitor of kappa light polypeptide gene enhancer in B-cells, kinase epsilon
hsa-let-7i-5p	down	IL13	interleukin 13
hsa-let-7i-5p	down	INSR	insulin receptor
hsa-let-7i-5p	down	IRS2	insulin receptor substrate 2
hsa-let-7i-5p	down	ITGB3	integrin, beta 3 (platelet glycoprotein IIIa, antigen CD61)
hsa-let-7i-5p	down	ITGB8	integrin, beta 8
hsa-let-7i-5p	down	LIMK2	LIM domain kinase 2
hsa-let-7i-5p	down	MAP3K1	mitogen-activated protein kinase kinase kinase 1, E3 ubiquitin protein ligase
hsa-let-7i-5p	down	MAP4K3	mitogen-activated protein kinase kinase kinase kinase 3
hsa-let-7i-5p	down	MFSD8	major facilitator superfamily domain containing 8
hsa-let-7i-5p	down	MGAT3	mannosyl (beta-1,4-)-glycoprotein beta-1,4-N-acetylglucosaminyltransferase
hsa-let-7i-5p	down	MGAT4A	mannosyl (alpha-1,3-)-glycoprotein beta-1,4-N-acetylglucosaminyltransferase, isozyme A
hsa-let-7i-5p	down	MGLL	monoglyceride lipase
hsa-let-7i-5p	down	MLLT4	myeloid/lymphoid or mixed-lineage leukemia (trithorax homolog, Drosophila); translocated to, 4
hsa-let-7i-5p	down	NDST3	N-deacetylase/N-sulfotransferase (heparan glucosaminyl) 3
hsa-let-7i-5p	down	NKD1	naked cuticle homolog 1 (Drosophila)
hsa-let-7i-5p	down	NLK	nemo-like kinase
hsa-let-7i-5p	down	NME4	non-metastatic cells 4, protein expressed in
hsa-let-7i-5p	down	NRAS	neuroblastoma RAS viral (v-ras) oncogene homolog
hsa-let-7i-5p	down	OPRM1	opioid receptor, mu 1
hsa-let-7i-5p	down	OSMR	oncostatin M receptor
hsa-let-7i-5p	down	PAK1	p21 protein (Cdc42/Rac)-activated kinase 1
hsa-let-7i-5p	down	PARD6B	par-6 partitioning defective 6 homolog beta (C. elegans)
hsa-let-7i-5p	down	PBX3	pre-B-cell leukemia homeobox 3
hsa-let-7i-5p	down	PIGA	phosphatidylinositol glycan anchor biosynthesis, class A
hsa-let-7i-5p	down	PLA2G15	phospholipase A2, group XV
hsa-let-7i-5p	down	POLR2D	polymerase (RNA) II (DNA directed) polypeptide D
hsa-let-7i-5p	down	PPP1R12B	protein phosphatase 1, regulatory subunit 12B
hsa-let-7i-5p	down	PRKAB2	protein kinase, AMP-activated, beta 2 non-catalytic subunit
hsa-let-7i-5p	down	PRLR	prolactin receptor
hsa-let-7i-5p	down	QARS	glutaminyl-tRNA synthetase
hsa-let-7i-5p	down	RAB11FIP4	RAB11 family interacting protein 4 (class II)
hsa-let-7i-5p	down	RALB	v-ral simian leukemia viral oncogene homolog B (ras related; GTP binding protein)
hsa-let-7i-5p	down	RDH10	retinol dehydrogenase 10 (all-trans)
hsa-let-7i-5p	down	RDX	radixin
hsa-let-7i-5p	down	RICTOR	RPTOR independent companion of MTOR, complex 2
hsa-let-7i-5p	down	RNMT	RNA (guanine-7-) methyltransferase
hsa-let-7i-5p	down	RPS6KA3	ribosomal protein S6 kinase, 90kDa, polypeptide 3
hsa-let-7i-5p	down	RRAGD	Ras-related GTP binding D
hsa-let-7i-5p	down	SEMA4C	sema domain, immunoglobulin domain (Ig), transmembrane domain (TM) and short cytoplasmic domain, (semaphorin) 4C
hsa-let-7i-5p	down	SMC1A	structural maintenance of chromosomes 1A
hsa-let-7i-5p	down	SOCS4	suppressor of cytokine signaling 4
hsa-let-7i-5p	down	SRGAP3	SLIT-ROBO Rho GTPase activating protein 3
hsa-let-7i-5p	down	SSH1	slingshot homolog 1 (Drosophila)
hsa-let-7i-5p	down	STX17	syntaxin 17
hsa-let-7i-5p	down	TGDS	TDP-glucose 4,6-dehydratase
hsa-let-7i-5p	down	THBS1	thrombospondin 1
hsa-let-7i-5p	down	TMPRSS2	transmembrane protease, serine 2
hsa-let-7i-5p	down	TNFRSF1B	tumor necrosis factor receptor superfamily, member 1B
hsa-let-7i-5p	down	TOB2	transducer of ERBB2, 2
hsa-let-7i-5p	down	TP53	tumor protein p53
hsa-let-7i-5p	down	TRPM6	transient receptor potential cation channel, subfamily M, member 6
hsa-let-7i-5p	down	UBE2G2	ubiquitin-conjugating enzyme E2G 2
hsa-let-7i-5p	down	ULK2	unc-51-like kinase 2 (C. elegans)
hsa-let-7i-5p	down	UNC5A	unc-5 homolog A (C. elegans)
hsa-let-7i-5p	down	XRN1	5'-3' exoribonuclease 1
hsa-let-7i-5p	down	XYLT1	xylosyltransferase I
hsa-let-7i-5p	down	YOD1	YOD1 OTU deubiquinating enzyme 1 homolog (S. cerevisiae)
hsa-let-7i-5p	down	ZFYVE16	zinc finger, FYVE domain containing 16
hsa-miR-106a-5p	up	ABL2	v-abl Abelson murine leukemia viral oncogene homolog 2
hsa-miR-106a-5p	up	ACAP2	ArfGAP with coiled-coil, ankyrin repeat and PH domains 2
hsa-miR-106a-5p	up	ACSL4	acyl-CoA synthetase long-chain family member 4
hsa-miR-106a-5p	up	ADIPOR2	adiponectin receptor 2
hsa-miR-106a-5p	up	ADRA1B	adrenergic, alpha-1B-, receptor
hsa-miR-106a-5p	up	ARHGEF11	Rho guanine nucleotide exchange factor (GEF) 11
hsa-miR-106a-5p	up	ARHGEF7	Rho guanine nucleotide exchange factor (GEF) 7
hsa-miR-106a-5p	up	ATP1A2	ATPase, Na+/K+ transporting, alpha 2 polypeptide
hsa-miR-106a-5p	up	ATP2B2	ATPase, Ca++ transporting, plasma membrane 2
hsa-miR-106a-5p	up	BAMBI	BMP and activin membrane-bound inhibitor homolog (Xenopus laevis)
hsa-miR-106a-5p	up	BCL2L11	BCL2-like 11 (apoptosis facilitator)
hsa-miR-106a-5p	up	BCR	breakpoint cluster region
hsa-miR-106a-5p	up	BMPR2	bone morphogenetic protein receptor, type II (serine/threonine kinase)
hsa-miR-106a-5p	up	CCL1	chemokine (C-C motif) ligand 1
hsa-miR-106a-5p	up	CCND1	cyclin D1
hsa-miR-106a-5p	up	CFL2	cofilin 2 (muscle)
hsa-miR-106a-5p	up	CLOCK	clock homolog (mouse)
hsa-miR-106a-5p	up	CNOT4	CCR4-NOT transcription complex, subunit 4
hsa-miR-106a-5p	up	COX7A2L	cytochrome c oxidase subunit VIIa polypeptide 2 like
hsa-miR-106a-5p	up	CREB1	cAMP responsive element binding protein 1
hsa-miR-106a-5p	up	CRK	v-crk sarcoma virus CT10 oncogene homolog (avian)
hsa-miR-106a-5p	up	CRTC3	CREB regulated transcription coactivator 3
hsa-miR-106a-5p	up	CTSA	cathepsin A
hsa-miR-106a-5p	up	CUL3	cullin 3
hsa-miR-106a-5p	up	CXCL14	chemokine (C-X-C motif) ligand 14
hsa-miR-106a-5p	up	CYBB	cytochrome b-245, beta polypeptide
hsa-miR-106a-5p	up	CYBRD1	cytochrome b reductase 1
hsa-miR-106a-5p	up	DAPK2	death-associated protein kinase 2
hsa-miR-106a-5p	up	DNM2	dynamin 2
hsa-miR-106a-5p	up	DPYSL5	dihydropyrimidinase-like 5
hsa-miR-106a-5p	up	DYNC1LI2	dynein, cytoplasmic 1, light intermediate chain 2
hsa-miR-106a-5p	up	E2F2	E2F transcription factor 2
hsa-miR-106a-5p	up	E2F5	E2F transcription factor 5, p130-binding
hsa-miR-106a-5p	up	EFNB1	ephrin-B1
hsa-miR-106a-5p	up	EHD3	EH-domain containing 3
hsa-miR-106a-5p	up	EIF2S1	eukaryotic translation initiation factor 2, subunit 1 alpha, 35kDa
hsa-miR-106a-5p	up	ELK4	ELK4, ETS-domain protein (SRF accessory protein 1)
hsa-miR-106a-5p	up	ENTPD4	ectonucleoside triphosphate diphosphohydrolase 4
hsa-miR-106a-5p	up	EPHA4	EPH receptor A4
hsa-miR-106a-5p	up	EPHA7	EPH receptor A7
hsa-miR-106a-5p	up	EPHB4	EPH receptor B4
hsa-miR-106a-5p	up	ERBB3	v-erb-b2 erythroblastic leukemia viral oncogene homolog 3 (avian)
hsa-miR-106a-5p	up	EREG	epiregulin
hsa-miR-106a-5p	up	ERO1LB	ERO1-like beta (S. cerevisiae)
hsa-miR-106a-5p	up	ETV1	ets variant 1
hsa-miR-106a-5p	up	FLT1	fms-related tyrosine kinase 1 (vascular endothelial growth factor/vascular permeability factor receptor)
hsa-miR-106a-5p	up	FURIN	furin (paired basic amino acid cleaving enzyme)
hsa-miR-106a-5p	up	FZD3	frizzled family receptor 3
hsa-miR-106a-5p	up	GAB1	GRB2-associated binding protein 1
hsa-miR-106a-5p	up	GABBR1	gamma-aminobutyric acid (GABA) B receptor, 1
hsa-miR-106a-5p	up	GDA	guanine deaminase
hsa-miR-106a-5p	up	GNB5	guanine nucleotide binding protein (G protein), beta 5
hsa-miR-106a-5p	up	GNS	glucosamine (N-acetyl)-6-sulfatase
hsa-miR-106a-5p	up	GPD2	glycerol-3-phosphate dehydrogenase 2 (mitochondrial)
hsa-miR-106a-5p	up	GUCY1A3	guanylate cyclase 1, soluble, alpha 3
hsa-miR-106a-5p	up	HMGA2	high mobility group AT-hook 2
hsa-miR-106a-5p	up	IL1RAP	interleukin 1 receptor accessory protein
hsa-miR-106a-5p	up	IL25	interleukin 25
hsa-miR-106a-5p	up	IL8	interleukin 8
hsa-miR-106a-5p	up	IPMK	inositol polyphosphate multikinase
hsa-miR-106a-5p	up	IQSEC1	IQ motif and Sec7 domain 1
hsa-miR-106a-5p	up	IQSEC2	IQ motif and Sec7 domain 2
hsa-miR-106a-5p	up	IRAK4	interleukin-1 receptor-associated kinase 4
hsa-miR-106a-5p	up	IRF1	interferon regulatory factor 1
hsa-miR-106a-5p	up	ITGB8	integrin, beta 8
hsa-miR-106a-5p	up	ITPKB	inositol-trisphosphate 3-kinase B
hsa-miR-106a-5p	up	JAK1	Janus kinase 1
hsa-miR-106a-5p	up	KAT2B	K(lysine) acetyltransferase 2B
hsa-miR-106a-5p	up	KCNK10	potassium channel, subfamily K, member 10
hsa-miR-106a-5p	up	KIF5A	kinesin family member 5A
hsa-miR-106a-5p	up	KPNA2	karyopherin alpha 2 (RAG cohort 1, importin alpha 1)
hsa-miR-106a-5p	up	LAPTM4A	lysosomal protein transmembrane 4 alpha
hsa-miR-106a-5p	up	LDLR	low density lipoprotein receptor
hsa-miR-106a-5p	up	LIF	leukemia inhibitory factor
hsa-miR-106a-5p	up	M6PR	mannose-6-phosphate receptor (cation dependent)
hsa-miR-106a-5p	up	MAP3K11	mitogen-activated protein kinase kinase kinase 11
hsa-miR-106a-5p	up	MAP3K14	mitogen-activated protein kinase kinase kinase 14
hsa-miR-106a-5p	up	MAP3K2	mitogen-activated protein kinase kinase kinase 2
hsa-miR-106a-5p	up	MAP3K8	mitogen-activated protein kinase kinase kinase 8
hsa-miR-106a-5p	up	MAPK9	mitogen-activated protein kinase 9
hsa-miR-106a-5p	up	MCM3	minichromosome maintenance complex component 3
hsa-miR-106a-5p	up	MMP2	matrix metallopeptidase 2 (gelatinase A, 72kDa gelatinase, 72kDa type IV collagenase)
hsa-miR-106a-5p	up	MYCN	v-myc myelocytomatosis viral related oncogene, neuroblastoma derived (avian)
hsa-miR-106a-5p	up	NAPEPLD	N-acyl phosphatidylethanolamine phospholipase D
hsa-miR-106a-5p	up	NCOR1	nuclear receptor corepressor 1
hsa-miR-106a-5p	up	NEDD4L	neural precursor cell expressed, developmentally down-regulated 4-like, E3 ubiquitin protein ligase
hsa-miR-106a-5p	up	NFAT5	nuclear factor of activated T-cells 5, tonicity-responsive
hsa-miR-106a-5p	up	NPLOC4	nuclear protein localization 4 homolog (S. cerevisiae)
hsa-miR-106a-5p	up	NR4A3	nuclear receptor subfamily 4, group A, member 3
hsa-miR-106a-5p	up	NTN1	netrin 1
hsa-miR-106a-5p	up	NTN4	netrin 4
hsa-miR-106a-5p	up	OSM	oncostatin M
hsa-miR-106a-5p	up	P2RX4	purinergic receptor P2X, ligand-gated ion channel, 4
hsa-miR-106a-5p	up	PAPOLA	poly(A) polymerase alpha
hsa-miR-106a-5p	up	PCYT1B	phosphate cytidylyltransferase 1, choline, beta
hsa-miR-106a-5p	up	PDGFRA	platelet-derived growth factor receptor, alpha polypeptide
hsa-miR-106a-5p	up	PIP4K2C	phosphatidylinositol-5-phosphate 4-kinase, type II, gamma
hsa-miR-106a-5p	up	PKN2	protein kinase N2
hsa-miR-106a-5p	up	PLA2G6	phospholipase A2, group VI (cytosolic, calcium-independent)
hsa-miR-106a-5p	up	PLEKHO2	pleckstrin homology domain containing, family O member 2
hsa-miR-106a-5p	up	PLXNA1	plexin A1
hsa-miR-106a-5p	up	POLR3G	polymerase (RNA) III (DNA directed) polypeptide G (32kD)
hsa-miR-106a-5p	up	PPARA	peroxisome proliferator-activated receptor alpha
hsa-miR-106a-5p	up	PPM1A	protein phosphatase, Mg2+/Mn2+ dependent, 1A
hsa-miR-106a-5p	up	PPP1R12B	protein phosphatase 1, regulatory subunit 12B
hsa-miR-106a-5p	up	PPP1R3B	protein phosphatase 1, regulatory subunit 3B
hsa-miR-106a-5p	up	PPP2R3A	protein phosphatase 2, regulatory subunit B'', alpha
hsa-miR-106a-5p	up	PPP3R1	protein phosphatase 3, regulatory subunit B, alpha
hsa-miR-106a-5p	up	PSEN1	presenilin 1
hsa-miR-106a-5p	up	PTGDR	prostaglandin D2 receptor (DP)
hsa-miR-106a-5p	up	PTGER3	prostaglandin E receptor 3 (subtype EP3)
hsa-miR-106a-5p	up	RAB11FIP1	RAB11 family interacting protein 1 (class I)
hsa-miR-106a-5p	up	RAB11FIP4	RAB11 family interacting protein 4 (class II)
hsa-miR-106a-5p	up	RAB11FIP5	RAB11 family interacting protein 5 (class I)
hsa-miR-106a-5p	up	RAB22A	RAB22A, member RAS oncogene family
hsa-miR-106a-5p	up	RAB5B	RAB5B, member RAS oncogene family
hsa-miR-106a-5p	up	RABEP1	rabaptin, RAB GTPase binding effector protein 1
hsa-miR-106a-5p	up	RAD23B	RAD23 homolog B (S. cerevisiae)
hsa-miR-106a-5p	up	RAPGEF2	Rap guanine nucleotide exchange factor (GEF) 2
hsa-miR-106a-5p	up	RBL2	retinoblastoma-like 2 (p130)
hsa-miR-106a-5p	up	RORA	RAR-related orphan receptor A
hsa-miR-106a-5p	up	RPS6KA2	ribosomal protein S6 kinase, 90kDa, polypeptide 2
hsa-miR-106a-5p	up	RPS6KA3	ribosomal protein S6 kinase, 90kDa, polypeptide 3
hsa-miR-106a-5p	up	RPS6KA5	ribosomal protein S6 kinase, 90kDa, polypeptide 5
hsa-miR-106a-5p	up	RRAGD	Ras-related GTP binding D
hsa-miR-106a-5p	up	S1PR1	sphingosine-1-phosphate receptor 1
hsa-miR-106a-5p	up	SAR1B	SAR1 homolog B (S. cerevisiae)
hsa-miR-106a-5p	up	SEMA4G	sema domain, immunoglobulin domain (Ig), transmembrane domain (TM) and short cytoplasmic domain, (semaphorin) 4G
hsa-miR-106a-5p	up	SEMA5A	sema domain, seven thrombospondin repeats (type 1 and type 1-like), transmembrane domain (TM) and short cytoplasmic domain, (semaphorin) 5A
hsa-miR-106a-5p	up	SEPT2	septin 2
hsa-miR-106a-5p	up	SESN2	sestrin 2
hsa-miR-106a-5p	up	SHANK2	SH3 and multiple ankyrin repeat domains 2
hsa-miR-106a-5p	up	SIRPA	signal-regulatory protein alpha
hsa-miR-106a-5p	up	SLC11A1	solute carrier family 11 (proton-coupled divalent metal ion transporters), member 1
hsa-miR-106a-5p	up	SLC2A4	solute carrier family 2 (facilitated glucose transporter), member 4
hsa-miR-106a-5p	up	SLC40A1	solute carrier family 40 (iron-regulated transporter), member 1
hsa-miR-106a-5p	up	SMAD5	SMAD family member 5
hsa-miR-106a-5p	up	SPRED1	sprouty-related, EVH1 domain containing 1
hsa-miR-106a-5p	up	SRGAP1	SLIT-ROBO Rho GTPase activating protein 1
hsa-miR-106a-5p	up	SRGAP3	SLIT-ROBO Rho GTPase activating protein 3
hsa-miR-106a-5p	up	SSH2	slingshot homolog 2 (Drosophila)
hsa-miR-106a-5p	up	STAT3	signal transducer and activator of transcription 3 (acute-phase response factor)
hsa-miR-106a-5p	up	TAOK2	TAO kinase 2
hsa-miR-106a-5p	up	TAOK3	TAO kinase 3
hsa-miR-106a-5p	up	TIAM1	T-cell lymphoma invasion and metastasis 1
hsa-miR-106a-5p	up	TOLLIP	toll interacting protein
hsa-miR-106a-5p	up	TRPV6	transient receptor potential cation channel, subfamily V, member 6
hsa-miR-106a-5p	up	UBE2Q2	ubiquitin-conjugating enzyme E2Q family member 2
hsa-miR-106a-5p	up	UBE2W	ubiquitin-conjugating enzyme E2W (putative)
hsa-miR-106a-5p	up	UBE3C	ubiquitin protein ligase E3C
hsa-miR-106a-5p	up	UBQLN4	ubiquilin 4
hsa-miR-106a-5p	up	UBR5	ubiquitin protein ligase E3 component n-recognin 5
hsa-miR-106a-5p	up	UPF3A	UPF3 regulator of nonsense transcripts homolog A (yeast)
hsa-miR-106a-5p	up	WDR82	WD repeat domain 82
hsa-miR-106a-5p	up	WEE1	WEE1 homolog (S. pombe)
hsa-miR-106a-5p	up	WFS1	Wolfram syndrome 1 (wolframin)
hsa-miR-106a-5p	up	WHSC1	Wolf-Hirschhorn syndrome candidate 1
hsa-miR-106a-5p	up	XIAP	X-linked inhibitor of apoptosis
hsa-miR-106a-5p	up	YOD1	YOD1 OTU deubiquinating enzyme 1 homolog (S. cerevisiae)
hsa-miR-106a-5p	up	ZFYVE16	zinc finger, FYVE domain containing 16
hsa-miR-106a-5p	up	ZFYVE20	zinc finger, FYVE domain containing 20
hsa-miR-106a-5p	up	ZMAT3	zinc finger, matrin-type 3
hsa-miR-1246	down	CALM2	calmodulin 2 (phosphorylase kinase, delta)
hsa-miR-1246	down	CAV1	caveolin 1, caveolae protein, 22kDa
hsa-miR-1246	down	GNRHR	gonadotropin-releasing hormone receptor
hsa-miR-1246	down	GRIA1	glutamate receptor, ionotropic, AMPA 1
hsa-miR-1246	down	LPIN2	lipin 2
hsa-miR-1246	down	MC2R	melanocortin 2 receptor (adrenocorticotropic hormone)
hsa-miR-1246	down	PSD3	pleckstrin and Sec7 domain containing 3
hsa-miR-1246	down	SEMA6A	sema domain, transmembrane domain (TM), and cytoplasmic domain, (semaphorin) 6A
hsa-miR-1246	down	UNC5B	unc-5 homolog B (C. elegans)
hsa-miR-142-5p	down	ATP1B1	ATPase, Na+/K+ transporting, beta 1 polypeptide
hsa-miR-142-5p	down	ENTPD1	ectonucleoside triphosphate diphosphohydrolase 1
hsa-miR-142-5p	down	GOSR1	golgi SNAP receptor complex member 1
hsa-miR-142-5p	down	ITGAV	integrin, alpha V (vitronectin receptor, alpha polypeptide, antigen CD51)
hsa-miR-142-5p	down	PCLO	piccolo (presynaptic cytomatrix protein)
hsa-miR-142-5p	down	SNAP29	synaptosomal-associated protein, 29kDa
hsa-miR-146a-5p	down	CCDC6	coiled-coil domain containing 6
hsa-miR-146a-5p	down	CDS1	CDP-diacylglycerol synthase (phosphatidate cytidylyltransferase) 1
hsa-miR-146a-5p	down	EARS2	glutamyl-tRNA synthetase 2, mitochondrial (putative)
hsa-miR-146a-5p	down	ERBB4	v-erb-a erythroblastic leukemia viral oncogene homolog 4 (avian)
hsa-miR-146a-5p	down	GALNT10	UDP-N-acetyl-alpha-D-galactosamine:polypeptide N-acetylgalactosaminyltransferase 10 (GalNAc-T10)
hsa-miR-146a-5p	down	IRAK1	interleukin-1 receptor-associated kinase 1
hsa-miR-146a-5p	down	NF2	neurofibromin 2 (merlin)
hsa-miR-146a-5p	down	NFASC	neurofascin
hsa-miR-146a-5p	down	NOTCH2	notch 2
hsa-miR-146a-5p	down	NSD1	nuclear receptor binding SET domain protein 1
hsa-miR-146a-5p	down	PPM1A	protein phosphatase, Mg2+/Mn2+ dependent, 1A
hsa-miR-146a-5p	down	PRKCE	protein kinase C, epsilon
hsa-miR-146a-5p	down	RNASEL	ribonuclease L (2',5'-oligoisoadenylate synthetase-dependent)
hsa-miR-146a-5p	down	SLC38A1	solute carrier family 38, member 1
hsa-miR-146a-5p	down	SORT1	sortilin 1
hsa-miR-146a-5p	down	TLN2	talin 2
hsa-miR-146a-5p	down	TRAF6	TNF receptor-associated factor 6, E3 ubiquitin protein ligase
hsa-miR-149-3p	down	ADCY1	adenylate cyclase 1 (brain)
hsa-miR-149-3p	down	ADCYAP1R1	adenylate cyclase activating polypeptide 1 (pituitary) receptor type I
hsa-miR-149-3p	down	ADRBK1	adrenergic, beta, receptor kinase 1
hsa-miR-149-3p	down	AGAP2	ArfGAP with GTPase domain, ankyrin repeat and PH domain 2
hsa-miR-149-3p	down	AGAP3	ArfGAP with GTPase domain, ankyrin repeat and PH domain 3
hsa-miR-149-3p	down	ALPL	alkaline phosphatase, liver/bone/kidney
hsa-miR-149-3p	down	AP2A1	adaptor-related protein complex 2, alpha 1 subunit
hsa-miR-149-3p	down	AP3S2	adaptor-related protein complex 3, sigma 2 subunit
hsa-miR-149-3p	down	ARC	activity-regulated cytoskeleton-associated protein
hsa-miR-149-3p	down	ARFGAP2	ADP-ribosylation factor GTPase activating protein 2
hsa-miR-149-3p	down	ATP1B2	ATPase, Na+/K+ transporting, beta 2 polypeptide
hsa-miR-149-3p	down	BCL2L11	BCL2-like 11 (apoptosis facilitator)
hsa-miR-149-3p	down	CACNB1	calcium channel, voltage-dependent, beta 1 subunit
hsa-miR-149-3p	down	CADM3	cell adhesion molecule 3
hsa-miR-149-3p	down	CAMK2B	calcium/calmodulin-dependent protein kinase II beta
hsa-miR-149-3p	down	CAMKK1	calcium/calmodulin-dependent protein kinase kinase 1, alpha
hsa-miR-149-3p	down	CBL	Cbl proto-oncogene, E3 ubiquitin protein ligase
hsa-miR-149-3p	down	CHRM1	cholinergic receptor, muscarinic 1
hsa-miR-149-3p	down	CHRNE	cholinergic receptor, nicotinic, epsilon (muscle)
hsa-miR-149-3p	down	CHST1	carbohydrate (keratan sulfate Gal-6) sulfotransferase 1
hsa-miR-149-3p	down	CNOT3	CCR4-NOT transcription complex, subunit 3
hsa-miR-149-3p	down	CNOT6L	CCR4-NOT transcription complex, subunit 6-like
hsa-miR-149-3p	down	COL11A2	collagen, type XI, alpha 2
hsa-miR-149-3p	down	COL1A1	collagen, type I, alpha 1
hsa-miR-149-3p	down	COL4A4	collagen, type IV, alpha 4
hsa-miR-149-3p	down	CRTC1	CREB regulated transcription coactivator 1
hsa-miR-149-3p	down	CRY2	cryptochrome 2 (photolyase-like)
hsa-miR-149-3p	down	CSNK1G1	casein kinase 1, gamma 1
hsa-miR-149-3p	down	CXCR5	chemokine (C-X-C motif) receptor 5
hsa-miR-149-3p	down	CYP21A2	cytochrome P450, family 21, subfamily A, polypeptide 2
hsa-miR-149-3p	down	DERL3	Der1-like domain family, member 3
hsa-miR-149-3p	down	DES	desmin
hsa-miR-149-3p	down	DLG3	discs, large homolog 3 (Drosophila)
hsa-miR-149-3p	down	DNAJB2	DnaJ (Hsp40) homolog, subfamily B, member 2
hsa-miR-149-3p	down	DNMT3A	DNA (cytosine-5-)-methyltransferase 3 alpha
hsa-miR-149-3p	down	DPYSL5	dihydropyrimidinase-like 5
hsa-miR-149-3p	down	DUSP2	dual specificity phosphatase 2
hsa-miR-149-3p	down	DVL3	dishevelled, dsh homolog 3 (Drosophila)
hsa-miR-149-3p	down	EFNA3	ephrin-A3
hsa-miR-149-3p	down	EHD2	EH-domain containing 2
hsa-miR-149-3p	down	ELK1	ELK1, member of ETS oncogene family
hsa-miR-149-3p	down	EPHB3	EPH receptor B3
hsa-miR-149-3p	down	FADS2	fatty acid desaturase 2
hsa-miR-149-3p	down	FGD1	FYVE, RhoGEF and PH domain containing 1
hsa-miR-149-3p	down	FGF7	fibroblast growth factor 7
hsa-miR-149-3p	down	FGF8	fibroblast growth factor 8 (androgen-induced)
hsa-miR-149-3p	down	FOSB	FBJ murine osteosarcoma viral oncogene homolog B
hsa-miR-149-3p	down	FOSL2	FOS-like antigen 2
hsa-miR-149-3p	down	FRS2	fibroblast growth factor receptor substrate 2
hsa-miR-149-3p	down	FURIN	furin (paired basic amino acid cleaving enzyme)
hsa-miR-149-3p	down	GNAO1	guanine nucleotide binding protein (G protein), alpha activating activity polypeptide O
hsa-miR-149-3p	down	GPD1	glycerol-3-phosphate dehydrogenase 1 (soluble)
hsa-miR-149-3p	down	GRIK5	glutamate receptor, ionotropic, kainate 5
hsa-miR-149-3p	down	GRIN1	glutamate receptor, ionotropic, N-methyl D-aspartate 1
hsa-miR-149-3p	down	GRIN2A	glutamate receptor, ionotropic, N-methyl D-aspartate 2A
hsa-miR-149-3p	down	GSK3A	glycogen synthase kinase 3 alpha
hsa-miR-149-3p	down	IL2RG	interleukin 2 receptor, gamma
hsa-miR-149-3p	down	IMPA2	inositol(myo)-1(or 4)-monophosphatase 2
hsa-miR-149-3p	down	IQSEC2	IQ motif and Sec7 domain 2
hsa-miR-149-3p	down	IRS1	insulin receptor substrate 1
hsa-miR-149-3p	down	ITGA3	integrin, alpha 3 (antigen CD49C, alpha 3 subunit of VLA-3 receptor)
hsa-miR-149-3p	down	KCNQ4	potassium voltage-gated channel, KQT-like subfamily, member 4
hsa-miR-149-3p	down	LRRC4B	leucine rich repeat containing 4B
hsa-miR-149-3p	down	MAP3K3	mitogen-activated protein kinase kinase kinase 3
hsa-miR-149-3p	down	MAPT	microtubule-associated protein tau
hsa-miR-149-3p	down	MSI1	musashi homolog 1 (Drosophila)
hsa-miR-149-3p	down	MYO10	myosin X
hsa-miR-149-3p	down	NDST1	N-deacetylase/N-sulfotransferase (heparan glucosaminyl) 1
hsa-miR-149-3p	down	NDUFA4L2	NADH dehydrogenase (ubiquinone) 1 alpha subcomplex, 4-like 2
hsa-miR-149-3p	down	NFASC	neurofascin
hsa-miR-149-3p	down	NLGN3	neuroligin 3
hsa-miR-149-3p	down	NOS3	nitric oxide synthase 3 (endothelial cell)
hsa-miR-149-3p	down	NOX1	NADPH oxidase 1
hsa-miR-149-3p	down	NTN1	netrin 1
hsa-miR-149-3p	down	PDE1B	phosphodiesterase 1B, calmodulin-dependent
hsa-miR-149-3p	down	PDXP	pyridoxal (pyridoxine, vitamin B6) phosphatase
hsa-miR-149-3p	down	PGAM1	phosphoglycerate mutase 1 (brain)
hsa-miR-149-3p	down	PML	promyelocytic leukemia
hsa-miR-149-3p	down	PMM2	phosphomannomutase 2
hsa-miR-149-3p	down	POLR2F	polymerase (RNA) II (DNA directed) polypeptide F
hsa-miR-149-3p	down	PRKACA	protein kinase, cAMP-dependent, catalytic, alpha
hsa-miR-149-3p	down	PRPH2	peripherin 2 (retinal degeneration, slow)
hsa-miR-149-3p	down	PVRL1	poliovirus receptor-related 1 (herpesvirus entry mediator C)
hsa-miR-149-3p	down	RAB11B	RAB11B, member RAS oncogene family
hsa-miR-149-3p	down	RELT	RELT tumor necrosis factor receptor
hsa-miR-149-3p	down	SDC3	syndecan 3
hsa-miR-149-3p	down	SEMA6B	sema domain, transmembrane domain (TM), and cytoplasmic domain, (semaphorin) 6B
hsa-miR-149-3p	down	SEPT9	septin 9
hsa-miR-149-3p	down	SH2B1	SH2B adaptor protein 1
hsa-miR-149-3p	down	SLC17A7	solute carrier family 17 (sodium-dependent inorganic phosphate cotransporter), member 7
hsa-miR-149-3p	down	SLC9A3R2	solute carrier family 9, subfamily A (NHE3, cation proton antiporter 3), member 3 regulator 2
hsa-miR-149-3p	down	SMAD3	SMAD family member 3
hsa-miR-149-3p	down	SMG5	smg-5 homolog, nonsense mediated mRNA decay factor (C. elegans)
hsa-miR-149-3p	down	SMG6	smg-6 homolog, nonsense mediated mRNA decay factor (C. elegans)
hsa-miR-149-3p	down	SORBS1	sorbin and SH3 domain containing 1
hsa-miR-149-3p	down	SRGAP3	SLIT-ROBO Rho GTPase activating protein 3
hsa-miR-149-3p	down	SUFU	suppressor of fused homolog (Drosophila)
hsa-miR-149-3p	down	SUV420H2	suppressor of variegation 4-20 homolog 2 (Drosophila)
hsa-miR-149-3p	down	SV2A	synaptic vesicle glycoprotein 2A
hsa-miR-149-3p	down	TAF10	TAF10 RNA polymerase II, TATA box binding protein (TBP)-associated factor, 30kDa
hsa-miR-149-3p	down	TAP1	transporter 1, ATP-binding cassette, sub-family B (MDR/TAP)
hsa-miR-149-3p	down	TCF7	transcription factor 7 (T-cell specific, HMG-box)
hsa-miR-149-3p	down	TFE3	transcription factor binding to IGHM enhancer 3
hsa-miR-149-3p	down	THTPA	thiamine triphosphatase
hsa-miR-149-3p	down	TIMP3	TIMP metallopeptidase inhibitor 3
hsa-miR-149-3p	down	TOMM40	translocase of outer mitochondrial membrane 40 homolog (yeast)
hsa-miR-149-3p	down	UBE2Q1	ubiquitin-conjugating enzyme E2Q family member 1
hsa-miR-149-3p	down	VAMP1	vesicle-associated membrane protein 1 (synaptobrevin 1)
hsa-miR-149-3p	down	VAMP2	vesicle-associated membrane protein 2 (synaptobrevin 2)
hsa-miR-149-3p	down	VPS37C	vacuolar protein sorting 37 homolog C (S. cerevisiae)
hsa-miR-149-3p	down	WHSC1	Wolf-Hirschhorn syndrome candidate 1
hsa-miR-149-3p	down	WNT1	wingless-type MMTV integration site family, member 1
hsa-miR-150-5p	up	ACSL4	acyl-CoA synthetase long-chain family member 4
hsa-miR-150-5p	up	ACVR1B	activin A receptor, type IB
hsa-miR-150-5p	up	APC	adenomatous polyposis coli
hsa-miR-150-5p	up	CALCR	calcitonin receptor
hsa-miR-150-5p	up	CBL	Cbl proto-oncogene, E3 ubiquitin protein ligase
hsa-miR-150-5p	up	CCL5	chemokine (C-C motif) ligand 5
hsa-miR-150-5p	up	CDK5R1	cyclin-dependent kinase 5, regulatory subunit 1 (p35)
hsa-miR-150-5p	up	EGR2	early growth response 2
hsa-miR-150-5p	up	ELK1	ELK1, member of ETS oncogene family
hsa-miR-150-5p	up	EPHB2	EPH receptor B2
hsa-miR-150-5p	up	ETF1	eukaryotic translation termination factor 1
hsa-miR-150-5p	up	FZD4	frizzled family receptor 4
hsa-miR-150-5p	up	GSK3B	glycogen synthase kinase 3 beta
hsa-miR-150-5p	up	IRAK2	interleukin-1 receptor-associated kinase 2
hsa-miR-150-5p	up	ITGB3	integrin, beta 3 (platelet glycoprotein IIIa, antigen CD61)
hsa-miR-150-5p	up	MAPK13	mitogen-activated protein kinase 13
hsa-miR-150-5p	up	MMP14	matrix metallopeptidase 14 (membrane-inserted)
hsa-miR-150-5p	up	MRVI1	murine retrovirus integration site 1 homolog
hsa-miR-150-5p	up	NOTCH3	notch 3
hsa-miR-150-5p	up	PFN2	profilin 2
hsa-miR-150-5p	up	PISD	phosphatidylserine decarboxylase
hsa-miR-150-5p	up	PVRL2	poliovirus receptor-related 2 (herpesvirus entry mediator B)
hsa-miR-150-5p	up	RAD23B	RAD23 homolog B (S. cerevisiae)
hsa-miR-150-5p	up	RORA	RAR-related orphan receptor A
hsa-miR-150-5p	up	SLC2A1	solute carrier family 2 (facilitated glucose transporter), member 1
hsa-miR-150-5p	up	SP1	Sp1 transcription factor
hsa-miR-150-5p	up	STIM1	stromal interaction molecule 1
hsa-miR-150-5p	up	TAF5L	TAF5-like RNA polymerase II, p300/CBP-associated factor (PCAF)-associated factor, 65kDa
hsa-miR-150-5p	up	TP53	tumor protein p53
hsa-miR-150-5p	up	TP53INP1	tumor protein p53 inducible nuclear protein 1
hsa-miR-150-5p	up	TPM3	tropomyosin 3
hsa-miR-150-5p	up	UBE2R2	ubiquitin-conjugating enzyme E2R 2
hsa-miR-150-5p	up	ZEB1	zinc finger E-box binding homeobox 1
hsa-miR-17-5p	up	ABL2	v-abl Abelson murine leukemia viral oncogene homolog 2
hsa-miR-17-5p	up	ACAP2	ArfGAP with coiled-coil, ankyrin repeat and PH domains 2
hsa-miR-17-5p	up	ADIPOR2	adiponectin receptor 2
hsa-miR-17-5p	up	ADRA1B	adrenergic, alpha-1B-, receptor
hsa-miR-17-5p	up	ARHGEF11	Rho guanine nucleotide exchange factor (GEF) 11
hsa-miR-17-5p	up	ARHGEF7	Rho guanine nucleotide exchange factor (GEF) 7
hsa-miR-17-5p	up	ATP1A2	ATPase, Na+/K+ transporting, alpha 2 polypeptide
hsa-miR-17-5p	up	ATP2B2	ATPase, Ca++ transporting, plasma membrane 2
hsa-miR-17-5p	up	BAMBI	BMP and activin membrane-bound inhibitor homolog (Xenopus laevis)
hsa-miR-17-5p	up	BCL2L11	BCL2-like 11 (apoptosis facilitator)
hsa-miR-17-5p	up	BCR	breakpoint cluster region
hsa-miR-17-5p	up	BMPR2	bone morphogenetic protein receptor, type II (serine/threonine kinase)
hsa-miR-17-5p	up	CCND2	cyclin D2
hsa-miR-17-5p	up	CFL2	cofilin 2 (muscle)
hsa-miR-17-5p	up	CNOT4	CCR4-NOT transcription complex, subunit 4
hsa-miR-17-5p	up	COX7A2L	cytochrome c oxidase subunit VIIa polypeptide 2 like
hsa-miR-17-5p	up	CREB1	cAMP responsive element binding protein 1
hsa-miR-17-5p	up	CRK	v-crk sarcoma virus CT10 oncogene homolog (avian)
hsa-miR-17-5p	up	CRTC3	CREB regulated transcription coactivator 3
hsa-miR-17-5p	up	CTSA	cathepsin A
hsa-miR-17-5p	up	CUL3	cullin 3
hsa-miR-17-5p	up	CYBB	cytochrome b-245, beta polypeptide
hsa-miR-17-5p	up	CYBRD1	cytochrome b reductase 1
hsa-miR-17-5p	up	DAPK2	death-associated protein kinase 2
hsa-miR-17-5p	up	DNM2	dynamin 2
hsa-miR-17-5p	up	DPYSL5	dihydropyrimidinase-like 5
hsa-miR-17-5p	up	DYNC1LI2	dynein, cytoplasmic 1, light intermediate chain 2
hsa-miR-17-5p	up	E2F1	E2F transcription factor 1
hsa-miR-17-5p	up	E2F2	E2F transcription factor 2
hsa-miR-17-5p	up	E2F5	E2F transcription factor 5, p130-binding
hsa-miR-17-5p	up	EFNB1	ephrin-B1
hsa-miR-17-5p	up	EHD3	EH-domain containing 3
hsa-miR-17-5p	up	EIF2S1	eukaryotic translation initiation factor 2, subunit 1 alpha, 35kDa
hsa-miR-17-5p	up	ELK4	ELK4, ETS-domain protein (SRF accessory protein 1)
hsa-miR-17-5p	up	ENTPD4	ectonucleoside triphosphate diphosphohydrolase 4
hsa-miR-17-5p	up	EPHA4	EPH receptor A4
hsa-miR-17-5p	up	EPHB4	EPH receptor B4
hsa-miR-17-5p	up	ERBB3	v-erb-b2 erythroblastic leukemia viral oncogene homolog 3 (avian)
hsa-miR-17-5p	up	EREG	epiregulin
hsa-miR-17-5p	up	ERO1LB	ERO1-like beta (S. cerevisiae)
hsa-miR-17-5p	up	ETV1	ets variant 1
hsa-miR-17-5p	up	FBXW11	F-box and WD repeat domain containing 11
hsa-miR-17-5p	up	FLT1	fms-related tyrosine kinase 1 (vascular endothelial growth factor/vascular permeability factor receptor)
hsa-miR-17-5p	up	FURIN	furin (paired basic amino acid cleaving enzyme)
hsa-miR-17-5p	up	FZD3	frizzled family receptor 3
hsa-miR-17-5p	up	GAB1	GRB2-associated binding protein 1
hsa-miR-17-5p	up	GABBR1	gamma-aminobutyric acid (GABA) B receptor, 1
hsa-miR-17-5p	up	GDA	guanine deaminase
hsa-miR-17-5p	up	GNB5	guanine nucleotide binding protein (G protein), beta 5
hsa-miR-17-5p	up	GNS	glucosamine (N-acetyl)-6-sulfatase
hsa-miR-17-5p	up	GPD2	glycerol-3-phosphate dehydrogenase 2 (mitochondrial)
hsa-miR-17-5p	up	GUCY1A3	guanylate cyclase 1, soluble, alpha 3
hsa-miR-17-5p	up	HIF1A	hypoxia inducible factor 1, alpha subunit (basic helix-loop-helix transcription factor)
hsa-miR-17-5p	up	HMGA2	high mobility group AT-hook 2
hsa-miR-17-5p	up	IL1RAP	interleukin 1 receptor accessory protein
hsa-miR-17-5p	up	IL25	interleukin 25
hsa-miR-17-5p	up	IPMK	inositol polyphosphate multikinase
hsa-miR-17-5p	up	IQSEC1	IQ motif and Sec7 domain 1
hsa-miR-17-5p	up	IQSEC2	IQ motif and Sec7 domain 2
hsa-miR-17-5p	up	IRAK4	interleukin-1 receptor-associated kinase 4
hsa-miR-17-5p	up	IRF1	interferon regulatory factor 1
hsa-miR-17-5p	up	ITCH	itchy E3 ubiquitin protein ligase
hsa-miR-17-5p	up	ITGB8	integrin, beta 8
hsa-miR-17-5p	up	ITPKB	inositol-trisphosphate 3-kinase B
hsa-miR-17-5p	up	JAK1	Janus kinase 1
hsa-miR-17-5p	up	KAT2B	K(lysine) acetyltransferase 2B
hsa-miR-17-5p	up	KCNK10	potassium channel, subfamily K, member 10
hsa-miR-17-5p	up	KIF5A	kinesin family member 5A
hsa-miR-17-5p	up	KPNA2	karyopherin alpha 2 (RAG cohort 1, importin alpha 1)
hsa-miR-17-5p	up	LAPTM4A	lysosomal protein transmembrane 4 alpha
hsa-miR-17-5p	up	LDLR	low density lipoprotein receptor
hsa-miR-17-5p	up	LIF	leukemia inhibitory factor
hsa-miR-17-5p	up	M6PR	mannose-6-phosphate receptor (cation dependent)
hsa-miR-17-5p	up	MAP3K11	mitogen-activated protein kinase kinase kinase 11
hsa-miR-17-5p	up	MAP3K14	mitogen-activated protein kinase kinase kinase 14
hsa-miR-17-5p	up	MAP3K2	mitogen-activated protein kinase kinase kinase 2
hsa-miR-17-5p	up	MAP3K8	mitogen-activated protein kinase kinase kinase 8
hsa-miR-17-5p	up	MAPK9	mitogen-activated protein kinase 9
hsa-miR-17-5p	up	MBTPS1	membrane-bound transcription factor peptidase, site 1
hsa-miR-17-5p	up	MCM3	minichromosome maintenance complex component 3
hsa-miR-17-5p	up	MMP2	matrix metallopeptidase 2 (gelatinase A, 72kDa gelatinase, 72kDa type IV collagenase)
hsa-miR-17-5p	up	MYCN	v-myc myelocytomatosis viral related oncogene, neuroblastoma derived (avian)
hsa-miR-17-5p	up	NAPEPLD	N-acyl phosphatidylethanolamine phospholipase D
hsa-miR-17-5p	up	NCOR1	nuclear receptor corepressor 1
hsa-miR-17-5p	up	NEDD4L	neural precursor cell expressed, developmentally down-regulated 4-like, E3 ubiquitin protein ligase
hsa-miR-17-5p	up	NFAT5	nuclear factor of activated T-cells 5, tonicity-responsive
hsa-miR-17-5p	up	NPLOC4	nuclear protein localization 4 homolog (S. cerevisiae)
hsa-miR-17-5p	up	NR4A3	nuclear receptor subfamily 4, group A, member 3
hsa-miR-17-5p	up	NTN1	netrin 1
hsa-miR-17-5p	up	NTN4	netrin 4
hsa-miR-17-5p	up	OCRL	oculocerebrorenal syndrome of Lowe
hsa-miR-17-5p	up	OSM	oncostatin M
hsa-miR-17-5p	up	P2RX4	purinergic receptor P2X, ligand-gated ion channel, 4
hsa-miR-17-5p	up	PAFAH1B2	platelet-activating factor acetylhydrolase 1b, catalytic subunit 2 (30kDa)
hsa-miR-17-5p	up	PAPOLA	poly(A) polymerase alpha
hsa-miR-17-5p	up	PCYT1B	phosphate cytidylyltransferase 1, choline, beta
hsa-miR-17-5p	up	PDGFRA	platelet-derived growth factor receptor, alpha polypeptide
hsa-miR-17-5p	up	PFN2	profilin 2
hsa-miR-17-5p	up	PIP4K2C	phosphatidylinositol-5-phosphate 4-kinase, type II, gamma
hsa-miR-17-5p	up	PKN2	protein kinase N2
hsa-miR-17-5p	up	PLA2G6	phospholipase A2, group VI (cytosolic, calcium-independent)
hsa-miR-17-5p	up	PLEKHO2	pleckstrin homology domain containing, family O member 2
hsa-miR-17-5p	up	PLXNA1	plexin A1
hsa-miR-17-5p	up	POLR3G	polymerase (RNA) III (DNA directed) polypeptide G (32kD)
hsa-miR-17-5p	up	PPARA	peroxisome proliferator-activated receptor alpha
hsa-miR-17-5p	up	PPP1R12B	protein phosphatase 1, regulatory subunit 12B
hsa-miR-17-5p	up	PPP1R3B	protein phosphatase 1, regulatory subunit 3B
hsa-miR-17-5p	up	PPP2R3A	protein phosphatase 2, regulatory subunit B'', alpha
hsa-miR-17-5p	up	PPP3R1	protein phosphatase 3, regulatory subunit B, alpha
hsa-miR-17-5p	up	PSEN1	presenilin 1
hsa-miR-17-5p	up	PTGDR	prostaglandin D2 receptor (DP)
hsa-miR-17-5p	up	PTGER3	prostaglandin E receptor 3 (subtype EP3)
hsa-miR-17-5p	up	RAB11FIP1	RAB11 family interacting protein 1 (class I)
hsa-miR-17-5p	up	RAB11FIP4	RAB11 family interacting protein 4 (class II)
hsa-miR-17-5p	up	RAB11FIP5	RAB11 family interacting protein 5 (class I)
hsa-miR-17-5p	up	RAB22A	RAB22A, member RAS oncogene family
hsa-miR-17-5p	up	RAB5B	RAB5B, member RAS oncogene family
hsa-miR-17-5p	up	RAD23B	RAD23 homolog B (S. cerevisiae)
hsa-miR-17-5p	up	RBL2	retinoblastoma-like 2 (p130)
hsa-miR-17-5p	up	RORA	RAR-related orphan receptor A
hsa-miR-17-5p	up	RPS6KA2	ribosomal protein S6 kinase, 90kDa, polypeptide 2
hsa-miR-17-5p	up	RPS6KA3	ribosomal protein S6 kinase, 90kDa, polypeptide 3
hsa-miR-17-5p	up	RRAGD	Ras-related GTP binding D
hsa-miR-17-5p	up	RUNX1	runt-related transcription factor 1
hsa-miR-17-5p	up	S1PR1	sphingosine-1-phosphate receptor 1
hsa-miR-17-5p	up	SCN1A	sodium channel, voltage-gated, type I, alpha subunit
hsa-miR-17-5p	up	SEMA4G	sema domain, immunoglobulin domain (Ig), transmembrane domain (TM) and short cytoplasmic domain, (semaphorin) 4G
hsa-miR-17-5p	up	SEMA5A	sema domain, seven thrombospondin repeats (type 1 and type 1-like), transmembrane domain (TM) and short cytoplasmic domain, (semaphorin) 5A
hsa-miR-17-5p	up	SEPT2	septin 2
hsa-miR-17-5p	up	SHANK2	SH3 and multiple ankyrin repeat domains 2
hsa-miR-17-5p	up	SIRPA	signal-regulatory protein alpha
hsa-miR-17-5p	up	SLC11A1	solute carrier family 11 (proton-coupled divalent metal ion transporters), member 1
hsa-miR-17-5p	up	SLC1A2	solute carrier family 1 (glial high affinity glutamate transporter), member 2
hsa-miR-17-5p	up	SLC2A4	solute carrier family 2 (facilitated glucose transporter), member 4
hsa-miR-17-5p	up	SLC40A1	solute carrier family 40 (iron-regulated transporter), member 1
hsa-miR-17-5p	up	SMAD5	SMAD family member 5
hsa-miR-17-5p	up	SPRED1	sprouty-related, EVH1 domain containing 1
hsa-miR-17-5p	up	SRGAP1	SLIT-ROBO Rho GTPase activating protein 1
hsa-miR-17-5p	up	SRGAP3	SLIT-ROBO Rho GTPase activating protein 3
hsa-miR-17-5p	up	SSH2	slingshot homolog 2 (Drosophila)
hsa-miR-17-5p	up	STAT3	signal transducer and activator of transcription 3 (acute-phase response factor)
hsa-miR-17-5p	up	TAOK2	TAO kinase 2
hsa-miR-17-5p	up	TAOK3	TAO kinase 3
hsa-miR-17-5p	up	TIAM1	T-cell lymphoma invasion and metastasis 1
hsa-miR-17-5p	up	TOLLIP	toll interacting protein
hsa-miR-17-5p	up	TP53INP1	tumor protein p53 inducible nuclear protein 1
hsa-miR-17-5p	up	TRPV6	transient receptor potential cation channel, subfamily V, member 6
hsa-miR-17-5p	up	UBE2W	ubiquitin-conjugating enzyme E2W (putative)
hsa-miR-17-5p	up	UBE3C	ubiquitin protein ligase E3C
hsa-miR-17-5p	up	UBQLN4	ubiquilin 4
hsa-miR-17-5p	up	UPF3A	UPF3 regulator of nonsense transcripts homolog A (yeast)
hsa-miR-17-5p	up	WDR82	WD repeat domain 82
hsa-miR-17-5p	up	WEE1	WEE1 homolog (S. pombe)
hsa-miR-17-5p	up	WFS1	Wolfram syndrome 1 (wolframin)
hsa-miR-17-5p	up	WHSC1	Wolf-Hirschhorn syndrome candidate 1
hsa-miR-17-5p	up	XIAP	X-linked inhibitor of apoptosis
hsa-miR-17-5p	up	YOD1	YOD1 OTU deubiquinating enzyme 1 homolog (S. cerevisiae)
hsa-miR-17-5p	up	ZFYVE16	zinc finger, FYVE domain containing 16
hsa-miR-17-5p	up	ZFYVE20	zinc finger, FYVE domain containing 20
hsa-miR-17-5p	up	ZMAT3	zinc finger, matrin-type 3
hsa-miR-22-3p	up	ACVR1B	activin A receptor, type IB
hsa-miR-22-3p	up	ACVR2B	activin A receptor, type IIB
hsa-miR-22-3p	up	ADCY6	adenylate cyclase 6
hsa-miR-22-3p	up	ARHGEF12	Rho guanine nucleotide exchange factor (GEF) 12
hsa-miR-22-3p	up	ARPC5	actin related protein 2/3 complex, subunit 5, 16kDa
hsa-miR-22-3p	up	CALCR	calcitonin receptor
hsa-miR-22-3p	up	CAPN1	calpain 1, (mu/I) large subunit
hsa-miR-22-3p	up	CAV3	caveolin 3
hsa-miR-22-3p	up	CBL	Cbl proto-oncogene, E3 ubiquitin protein ligase
hsa-miR-22-3p	up	CDKN1A	cyclin-dependent kinase inhibitor 1A (p21, Cip1)
hsa-miR-22-3p	up	CIITA	class II, major histocompatibility complex, transactivator
hsa-miR-22-3p	up	CPEB1	cytoplasmic polyadenylation element binding protein 1
hsa-miR-22-3p	up	CSF1R	colony stimulating factor 1 receptor
hsa-miR-22-3p	up	CUL3	cullin 3
hsa-miR-22-3p	up	DDIT4	DNA-damage-inducible transcript 4
hsa-miR-22-3p	up	DGKE	diacylglycerol kinase, epsilon 64kDa
hsa-miR-22-3p	up	DNM3	dynamin 3
hsa-miR-22-3p	up	EDA	ectodysplasin A
hsa-miR-22-3p	up	ERBB3	v-erb-b2 erythroblastic leukemia viral oncogene homolog 3 (avian)
hsa-miR-22-3p	up	ESR1	estrogen receptor 1
hsa-miR-22-3p	up	ETV1	ets variant 1
hsa-miR-22-3p	up	FBXW7	F-box and WD repeat domain containing 7, E3 ubiquitin protein ligase
hsa-miR-22-3p	up	FTL	ferritin, light polypeptide
hsa-miR-22-3p	up	GABBR2	gamma-aminobutyric acid (GABA) B receptor, 2
hsa-miR-22-3p	up	GM2A	GM2 ganglioside activator
hsa-miR-22-3p	up	H3F3B	H3 histone, family 3B (H3.3B)
hsa-miR-22-3p	up	HDAC4	histone deacetylase 4
hsa-miR-22-3p	up	HDAC8	histone deacetylase 8
hsa-miR-22-3p	up	ITGA10	integrin, alpha 10
hsa-miR-22-3p	up	ITGA5	integrin, alpha 5 (fibronectin receptor, alpha polypeptide)
hsa-miR-22-3p	up	ITGB8	integrin, beta 8
hsa-miR-22-3p	up	LAMC1	laminin, gamma 1 (formerly LAMB2)
hsa-miR-22-3p	up	LAT	linker for activation of T cells
hsa-miR-22-3p	up	LTB4R	leukotriene B4 receptor
hsa-miR-22-3p	up	MAP3K12	mitogen-activated protein kinase kinase kinase 12
hsa-miR-22-3p	up	MAPK14	mitogen-activated protein kinase 14
hsa-miR-22-3p	up	MAVS	mitochondrial antiviral signaling protein
hsa-miR-22-3p	up	MAX	MYC associated factor X
hsa-miR-22-3p	up	NFYA	nuclear transcription factor Y, alpha
hsa-miR-22-3p	up	NR3C1	nuclear receptor subfamily 3, group C, member 1 (glucocorticoid receptor)
hsa-miR-22-3p	up	NRAS	neuroblastoma RAS viral (v-ras) oncogene homolog
hsa-miR-22-3p	up	NTRK2	neurotrophic tyrosine kinase, receptor, type 2
hsa-miR-22-3p	up	NXT2	nuclear transport factor 2-like export factor 2
hsa-miR-22-3p	up	PAFAH1B2	platelet-activating factor acetylhydrolase 1b, catalytic subunit 2 (30kDa)
hsa-miR-22-3p	up	PCLO	piccolo (presynaptic cytomatrix protein)
hsa-miR-22-3p	up	PIP4K2B	phosphatidylinositol-5-phosphate 4-kinase, type II, beta
hsa-miR-22-3p	up	PPARA	peroxisome proliferator-activated receptor alpha
hsa-miR-22-3p	up	PPP1R3B	protein phosphatase 1, regulatory subunit 3B
hsa-miR-22-3p	up	RAB5B	RAB5B, member RAS oncogene family
hsa-miR-22-3p	up	RFXANK	regulatory factor X-associated ankyrin-containing protein
hsa-miR-22-3p	up	RXFP2	relaxin/insulin-like family peptide receptor 2
hsa-miR-22-3p	up	SEMA4F	sema domain, immunoglobulin domain (Ig), transmembrane domain (TM) and short cytoplasmic domain, (semaphorin) 4F
hsa-miR-22-3p	up	SIRT1	sirtuin 1
hsa-miR-22-3p	up	SMAD4	SMAD family member 4
hsa-miR-22-3p	up	SMAP1	small ArfGAP 1
hsa-miR-22-3p	up	TNFRSF1B	tumor necrosis factor receptor superfamily, member 1B
hsa-miR-22-3p	up	TP53	tumor protein p53
hsa-miR-22-3p	up	TP53INP1	tumor protein p53 inducible nuclear protein 1
hsa-miR-22-3p	up	TPM3	tropomyosin 3
hsa-miR-22-3p	up	TRPM7	transient receptor potential cation channel, subfamily M, member 7
hsa-miR-22-3p	up	USP8	ubiquitin specific peptidase 8
hsa-miR-22-3p	up	WDR82	WD repeat domain 82
hsa-miR-27b-3p	down	ABCA1	ATP-binding cassette, sub-family A (ABC1), member 1
hsa-miR-27b-3p	down	ACE	angiotensin I converting enzyme (peptidyl-dipeptidase A) 1
hsa-miR-27b-3p	down	ACVR1C	activin A receptor, type IC
hsa-miR-27b-3p	down	ACVR2A	activin A receptor, type IIA
hsa-miR-27b-3p	down	ADCY3	adenylate cyclase 3
hsa-miR-27b-3p	down	ADCY6	adenylate cyclase 6
hsa-miR-27b-3p	down	ADORA2B	adenosine A2b receptor
hsa-miR-27b-3p	down	ALG9	asparagine-linked glycosylation 9, alpha-1,2-mannosyltransferase homolog (S. cerevisiae)
hsa-miR-27b-3p	down	ANK2	ankyrin 2, neuronal
hsa-miR-27b-3p	down	ARHGEF6	Rac/Cdc42 guanine nucleotide exchange factor (GEF) 6
hsa-miR-27b-3p	down	ATP2B1	ATPase, Ca++ transporting, plasma membrane 1
hsa-miR-27b-3p	down	B4GALT3	UDP-Gal:betaGlcNAc beta 1,4- galactosyltransferase, polypeptide 3
hsa-miR-27b-3p	down	BAG2	BCL2-associated athanogene 2
hsa-miR-27b-3p	down	BHLHE41	basic helix-loop-helix family, member e41
hsa-miR-27b-3p	down	BMI1	BMI1 polycomb ring finger oncogene
hsa-miR-27b-3p	down	BTG2	BTG family, member 2
hsa-miR-27b-3p	down	CACYBP	calcyclin binding protein
hsa-miR-27b-3p	down	CASC3	cancer susceptibility candidate 3
hsa-miR-27b-3p	down	CD28	CD28 molecule
hsa-miR-27b-3p	down	CDC25B	cell division cycle 25 homolog B (S. pombe)
hsa-miR-27b-3p	down	CDH5	cadherin 5, type 2 (vascular endothelium)
hsa-miR-27b-3p	down	CDK6	cyclin-dependent kinase 6
hsa-miR-27b-3p	down	CDS1	CDP-diacylglycerol synthase (phosphatidate cytidylyltransferase) 1
hsa-miR-27b-3p	down	COL11A2	collagen, type XI, alpha 2
hsa-miR-27b-3p	down	COL21A1	collagen, type XXI, alpha 1
hsa-miR-27b-3p	down	CSNK1G1	casein kinase 1, gamma 1
hsa-miR-27b-3p	down	DCP1A	DCP1 decapping enzyme homolog A (S. cerevisiae)
hsa-miR-27b-3p	down	DOT1L	DOT1-like, histone H3 methyltransferase (S. cerevisiae)
hsa-miR-27b-3p	down	DTX4	deltex homolog 4 (Drosophila)
hsa-miR-27b-3p	down	DVL2	dishevelled, dsh homolog 2 (Drosophila)
hsa-miR-27b-3p	down	EDAR	ectodysplasin A receptor
hsa-miR-27b-3p	down	EDNRA	endothelin receptor type A
hsa-miR-27b-3p	down	ENPP1	ectonucleotide pyrophosphatase/phosphodiesterase 1
hsa-miR-27b-3p	down	EPB41	erythrocyte membrane protein band 4.1 (elliptocytosis 1, RH-linked)
hsa-miR-27b-3p	down	EPHB2	EPH receptor B2
hsa-miR-27b-3p	down	EYA1	eyes absent homolog 1 (Drosophila)
hsa-miR-27b-3p	down	FBXW7	F-box and WD repeat domain containing 7, E3 ubiquitin protein ligase
hsa-miR-27b-3p	down	FOSB	FBJ murine osteosarcoma viral oncogene homolog B
hsa-miR-27b-3p	down	FOXO1	forkhead box O1
hsa-miR-27b-3p	down	GAB1	GRB2-associated binding protein 1
hsa-miR-27b-3p	down	GCNT2	glucosaminyl (N-acetyl) transferase 2, I-branching enzyme (I blood group)
hsa-miR-27b-3p	down	GDF6	growth differentiation factor 6
hsa-miR-27b-3p	down	GK	glycerol kinase
hsa-miR-27b-3p	down	GNS	glucosamine (N-acetyl)-6-sulfatase
hsa-miR-27b-3p	down	GOSR2	golgi SNAP receptor complex member 2
hsa-miR-27b-3p	down	GPAM	glycerol-3-phosphate acyltransferase, mitochondrial
hsa-miR-27b-3p	down	GSPT1	G1 to S phase transition 1
hsa-miR-27b-3p	down	HIP1	huntingtin interacting protein 1
hsa-miR-27b-3p	down	HYOU1	hypoxia up-regulated 1
hsa-miR-27b-3p	down	INSR	insulin receptor
hsa-miR-27b-3p	down	IRS1	insulin receptor substrate 1
hsa-miR-27b-3p	down	JMJD1C	jumonji domain containing 1C
hsa-miR-27b-3p	down	KCNK2	potassium channel, subfamily K, member 2
hsa-miR-27b-3p	down	KITLG	KIT ligand
hsa-miR-27b-3p	down	KRAS	v-Ki-ras2 Kirsten rat sarcoma viral oncogene homolog
hsa-miR-27b-3p	down	LAPTM4B	lysosomal protein transmembrane 4 beta
hsa-miR-27b-3p	down	LIMK2	LIM domain kinase 2
hsa-miR-27b-3p	down	LPCAT1	lysophosphatidylcholine acyltransferase 1
hsa-miR-27b-3p	down	LPIN1	lipin 1
hsa-miR-27b-3p	down	LRP6	low density lipoprotein receptor-related protein 6
hsa-miR-27b-3p	down	MAN2A1	mannosidase, alpha, class 2A, member 1
hsa-miR-27b-3p	down	MAP2K7	mitogen-activated protein kinase kinase 7
hsa-miR-27b-3p	down	MAP3K12	mitogen-activated protein kinase kinase kinase 12
hsa-miR-27b-3p	down	MAPKAPK3	mitogen-activated protein kinase-activated protein kinase 3
hsa-miR-27b-3p	down	MDM4	Mdm4 p53 binding protein homolog (mouse)
hsa-miR-27b-3p	down	NF1	neurofibromin 1
hsa-miR-27b-3p	down	NFASC	neurofascin
hsa-miR-27b-3p	down	NGFR	nerve growth factor receptor
hsa-miR-27b-3p	down	NXT2	nuclear transport factor 2-like export factor 2
hsa-miR-27b-3p	down	PDE10A	phosphodiesterase 10A
hsa-miR-27b-3p	down	PDE3A	phosphodiesterase 3A, cGMP-inhibited
hsa-miR-27b-3p	down	PDE3B	phosphodiesterase 3B, cGMP-inhibited
hsa-miR-27b-3p	down	PDE7B	phosphodiesterase 7B
hsa-miR-27b-3p	down	PDE8B	phosphodiesterase 8B
hsa-miR-27b-3p	down	PDHX	pyruvate dehydrogenase complex, component X
hsa-miR-27b-3p	down	PDK1	pyruvate dehydrogenase kinase, isozyme 1
hsa-miR-27b-3p	down	PDPK1	3-phosphoinositide dependent protein kinase-1
hsa-miR-27b-3p	down	PIK3CD	phosphoinositide-3-kinase, catalytic, delta polypeptide
hsa-miR-27b-3p	down	PPARA	peroxisome proliferator-activated receptor alpha
hsa-miR-27b-3p	down	PPARG	peroxisome proliferator-activated receptor gamma
hsa-miR-27b-3p	down	PPIF	peptidylprolyl isomerase F
hsa-miR-27b-3p	down	PPP1CC	protein phosphatase 1, catalytic subunit, gamma isozyme
hsa-miR-27b-3p	down	PRICKLE2	prickle homolog 2 (Drosophila)
hsa-miR-27b-3p	down	PRKCB	protein kinase C, beta
hsa-miR-27b-3p	down	PTCH1	patched 1
hsa-miR-27b-3p	down	PTGER3	prostaglandin E receptor 3 (subtype EP3)
hsa-miR-27b-3p	down	PXN	paxillin
hsa-miR-27b-3p	down	RET	ret proto-oncogene
hsa-miR-27b-3p	down	RNGTT	RNA guanylyltransferase and 5'-phosphatase
hsa-miR-27b-3p	down	RPS6KA5	ribosomal protein S6 kinase, 90kDa, polypeptide 5
hsa-miR-27b-3p	down	RPS6KB1	ribosomal protein S6 kinase, 70kDa, polypeptide 1
hsa-miR-27b-3p	down	SEC24A	SEC24 family, member A (S. cerevisiae)
hsa-miR-27b-3p	down	SEMA6D	sema domain, transmembrane domain (TM), and cytoplasmic domain, (semaphorin) 6D
hsa-miR-27b-3p	down	SETD7	SET domain containing (lysine methyltransferase) 7
hsa-miR-27b-3p	down	SFRP1	secreted frizzled-related protein 1
hsa-miR-27b-3p	down	SLC16A10	solute carrier family 16, member 10 (aromatic amino acid transporter)
hsa-miR-27b-3p	down	SLC1A2	solute carrier family 1 (glial high affinity glutamate transporter), member 2
hsa-miR-27b-3p	down	SMAD2	SMAD family member 2
hsa-miR-27b-3p	down	SMAD5	SMAD family member 5
hsa-miR-27b-3p	down	SP1	Sp1 transcription factor
hsa-miR-27b-3p	down	SPRY2	sprouty homolog 2 (Drosophila)
hsa-miR-27b-3p	down	SSH1	slingshot homolog 1 (Drosophila)
hsa-miR-27b-3p	down	ST6GALNAC3	ST6 (alpha-N-acetyl-neuraminyl-2,3-beta-galactosyl-1,3)-N-acetylgalactosaminide alpha-2,6-sialyltransferase 3
hsa-miR-27b-3p	down	STAG1	stromal antigen 1
hsa-miR-27b-3p	down	STIM2	stromal interaction molecule 2
hsa-miR-27b-3p	down	SUV420H1	suppressor of variegation 4-20 homolog 1 (Drosophila)
hsa-miR-27b-3p	down	TGFBR1	transforming growth factor, beta receptor 1
hsa-miR-27b-3p	down	UBE2N	ubiquitin-conjugating enzyme E2N
hsa-miR-27b-3p	down	UBR5	ubiquitin protein ligase E3 component n-recognin 5
hsa-miR-27b-3p	down	VANGL1	vang-like 1 (van gogh, Drosophila)
hsa-miR-27b-3p	down	VANGL2	vang-like 2 (van gogh, Drosophila)
hsa-miR-27b-3p	down	VAV3	vav 3 guanine nucleotide exchange factor
hsa-miR-27b-3p	down	WNT3A	wingless-type MMTV integration site family, member 3A
hsa-miR-27b-3p	down	YWHAB	tyrosine 3-monooxygenase/tryptophan 5-monooxygenase activation protein, beta polypeptide
hsa-miR-30c-5p	down	ABCC9	ATP-binding cassette, sub-family C (CFTR/MRP), member 9
hsa-miR-30c-5p	down	ACVR1	activin A receptor, type I
hsa-miR-30c-5p	down	ALG9	asparagine-linked glycosylation 9, alpha-1,2-mannosyltransferase homolog (S. cerevisiae)
hsa-miR-30c-5p	down	B3GNT5	UDP-GlcNAc:betaGal beta-1,3-N-acetylglucosaminyltransferase 5
hsa-miR-30c-5p	down	BCL2L11	BCL2-like 11 (apoptosis facilitator)
hsa-miR-30c-5p	down	BDNF	brain-derived neurotrophic factor
hsa-miR-30c-5p	down	CACNA1C	calcium channel, voltage-dependent, L type, alpha 1C subunit
hsa-miR-30c-5p	down	CFL2	cofilin 2 (muscle)
hsa-miR-30c-5p	down	CHST1	carbohydrate (keratan sulfate Gal-6) sulfotransferase 1
hsa-miR-30c-5p	down	CNOT6	CCR4-NOT transcription complex, subunit 6
hsa-miR-30c-5p	down	CNTN2	contactin 2 (axonal)
hsa-miR-30c-5p	down	COL9A3	collagen, type IX, alpha 3
hsa-miR-30c-5p	down	DAGLA	diacylglycerol lipase, alpha
hsa-miR-30c-5p	down	DCP1A	DCP1 decapping enzyme homolog A (S. cerevisiae)
hsa-miR-30c-5p	down	DPYSL2	dihydropyrimidinase-like 2
hsa-miR-30c-5p	down	FAHD1	fumarylacetoacetate hydrolase domain containing 1
hsa-miR-30c-5p	down	FRMD6	FERM domain containing 6
hsa-miR-30c-5p	down	GALNT1	UDP-N-acetyl-alpha-D-galactosamine:polypeptide N-acetylgalactosaminyltransferase 1 (GalNAc-T1)
hsa-miR-30c-5p	down	GALNT2	UDP-N-acetyl-alpha-D-galactosamine:polypeptide N-acetylgalactosaminyltransferase 2 (GalNAc-T2)
hsa-miR-30c-5p	down	GALNT3	UDP-N-acetyl-alpha-D-galactosamine:polypeptide N-acetylgalactosaminyltransferase 3 (GalNAc-T3)
hsa-miR-30c-5p	down	GALNT7	UDP-N-acetyl-alpha-D-galactosamine:polypeptide N-acetylgalactosaminyltransferase 7 (GalNAc-T7)
hsa-miR-30c-5p	down	GJA1	gap junction protein, alpha 1, 43kDa
hsa-miR-30c-5p	down	GNAI2	guanine nucleotide binding protein (G protein), alpha inhibiting activity polypeptide 2
hsa-miR-30c-5p	down	GNAO1	guanine nucleotide binding protein (G protein), alpha activating activity polypeptide O
hsa-miR-30c-5p	down	HERC2	HECT and RLD domain containing E3 ubiquitin protein ligase 2
hsa-miR-30c-5p	down	IDE	insulin-degrading enzyme
hsa-miR-30c-5p	down	IRS2	insulin receptor substrate 2
hsa-miR-30c-5p	down	ITGA5	integrin, alpha 5 (fibronectin receptor, alpha polypeptide)
hsa-miR-30c-5p	down	JAG2	jagged 2
hsa-miR-30c-5p	down	KCNJ12	potassium inwardly-rectifying channel, subfamily J, member 12
hsa-miR-30c-5p	down	LCLAT1	lysocardiolipin acyltransferase 1
hsa-miR-30c-5p	down	LRP6	low density lipoprotein receptor-related protein 6
hsa-miR-30c-5p	down	MBOAT1	membrane bound O-acyltransferase domain containing 1
hsa-miR-30c-5p	down	NAGPA	N-acetylglucosamine-1-phosphodiester alpha-N-acetylglucosaminidase
hsa-miR-30c-5p	down	NCOR2	nuclear receptor corepressor 2
hsa-miR-30c-5p	down	NEDD4	neural precursor cell expressed, developmentally down-regulated 4, E3 ubiquitin protein ligase
hsa-miR-30c-5p	down	NFAT5	nuclear factor of activated T-cells 5, tonicity-responsive
hsa-miR-30c-5p	down	NRG3	neuregulin 3
hsa-miR-30c-5p	down	PAX3	paired box 3
hsa-miR-30c-5p	down	PER3	period homolog 3 (Drosophila)
hsa-miR-30c-5p	down	PLXNC1	plexin C1
hsa-miR-30c-5p	down	RAB7A	RAB7A, member RAS oncogene family
hsa-miR-30c-5p	down	RASA1	RAS p21 protein activator (GTPase activating protein) 1
hsa-miR-30c-5p	down	RASGRP3	RAS guanyl releasing protein 3 (calcium and DAG-regulated)
hsa-miR-30c-5p	down	SEC24A	SEC24 family, member A (S. cerevisiae)
hsa-miR-30c-5p	down	SEC62	SEC62 homolog (S. cerevisiae)
hsa-miR-30c-5p	down	SEMA3A	sema domain, immunoglobulin domain (Ig), short basic domain, secreted, (semaphorin) 3A
hsa-miR-30c-5p	down	SERPINE1	serpin peptidase inhibitor, clade E (nexin, plasminogen activator inhibitor type 1), member 1
hsa-miR-30c-5p	down	SLC36A1	solute carrier family 36 (proton/amino acid symporter), member 1
hsa-miR-30c-5p	down	SLC6A3	solute carrier family 6 (neurotransmitter transporter, dopamine), member 3
hsa-miR-30c-5p	down	SNAI1	snail homolog 1 (Drosophila)
hsa-miR-30c-5p	down	SRGAP3	SLIT-ROBO Rho GTPase activating protein 3
hsa-miR-30c-5p	down	STAG2	stromal antigen 2
hsa-miR-30c-5p	down	STIM2	stromal interaction molecule 2
hsa-miR-30c-5p	down	TP53INP1	tumor protein p53 inducible nuclear protein 1
hsa-miR-30c-5p	down	TSC1	tuberous sclerosis 1
hsa-miR-30c-5p	down	UBE2G1	ubiquitin-conjugating enzyme E2G 1
hsa-miR-30c-5p	down	UBE3C	ubiquitin protein ligase E3C
hsa-miR-30c-5p	down	VAV3	vav 3 guanine nucleotide exchange factor
hsa-miR-30c-5p	down	WDR82	WD repeat domain 82
hsa-miR-30c-5p	down	WWP1	WW domain containing E3 ubiquitin protein ligase 1
hsa-miR-374b-5p	down	ACVR2B	activin A receptor, type IIB
hsa-miR-374b-5p	down	HCFC1	host cell factor C1 (VP16-accessory protein)
hsa-miR-374b-5p	down	PIKFYVE	phosphoinositide kinase, FYVE finger containing
hsa-miR-374b-5p	down	SEMA3D	sema domain, immunoglobulin domain (Ig), short basic domain, secreted, (semaphorin) 3D
hsa-miR-374b-5p	down	SHANK2	SH3 and multiple ankyrin repeat domains 2
hsa-miR-374b-5p	down	ZFYVE20	zinc finger, FYVE domain containing 20
hsa-miR-4267	up	ACSL5	acyl-CoA synthetase long-chain family member 5
hsa-miR-4267	up	ANK1	ankyrin 1, erythrocytic
hsa-miR-4267	up	BTG2	BTG family, member 2
hsa-miR-4267	up	CAMK2A	calcium/calmodulin-dependent protein kinase II alpha
hsa-miR-4267	up	DAGLA	diacylglycerol lipase, alpha
hsa-miR-4267	up	DGKZ	diacylglycerol kinase, zeta
hsa-miR-4267	up	GIT1	G protein-coupled receptor kinase interacting ArfGAP 1
hsa-miR-4267	up	IQSEC2	IQ motif and Sec7 domain 2
hsa-miR-4267	up	NCBP2	nuclear cap binding protein subunit 2, 20kDa
hsa-miR-4267	up	NEDD4L	neural precursor cell expressed, developmentally down-regulated 4-like, E3 ubiquitin protein ligase
hsa-miR-4267	up	NGFR	nerve growth factor receptor
hsa-miR-4267	up	NXF1	nuclear RNA export factor 1
hsa-miR-4267	up	SEPT6	septin 6
hsa-miR-4267	up	STIP1	stress-induced-phosphoprotein 1
hsa-miR-4267	up	STK4	serine/threonine kinase 4
hsa-miR-4443	up	AGPAT4	1-acylglycerol-3-phosphate O-acyltransferase 4 (lysophosphatidic acid acyltransferase, delta)
hsa-miR-4443	up	ATP2A2	ATPase, Ca++ transporting, cardiac muscle, slow twitch 2
hsa-miR-4443	up	CAMKK1	calcium/calmodulin-dependent protein kinase kinase 1, alpha
hsa-miR-4443	up	CHRNB2	cholinergic receptor, nicotinic, beta 2 (neuronal)
hsa-miR-4443	up	CREB1	cAMP responsive element binding protein 1
hsa-miR-4443	up	DLL4	delta-like 4 (Drosophila)
hsa-miR-4443	up	LIMD1	LIM domains containing 1
hsa-miR-4443	up	PDE1B	phosphodiesterase 1B, calmodulin-dependent
hsa-miR-4443	up	PRLR	prolactin receptor
hsa-miR-4443	up	PYDC1	PYD (pyrin domain) containing 1
hsa-miR-4443	up	TNFSF4	tumor necrosis factor (ligand) superfamily, member 4
hsa-miR-4690-5p	down	ACOX1	acyl-CoA oxidase 1, palmitoyl
hsa-miR-4690-5p	down	AP3S2	adaptor-related protein complex 3, sigma 2 subunit
hsa-miR-4690-5p	down	APC	adenomatous polyposis coli
hsa-miR-4690-5p	down	ATP2B2	ATPase, Ca++ transporting, plasma membrane 2
hsa-miR-4690-5p	down	CACNB1	calcium channel, voltage-dependent, beta 1 subunit
hsa-miR-4690-5p	down	CAMKK2	calcium/calmodulin-dependent protein kinase kinase 2, beta
hsa-miR-4690-5p	down	CD81	CD81 molecule
hsa-miR-4690-5p	down	CSNK1A1	casein kinase 1, alpha 1
hsa-miR-4690-5p	down	CTF1	cardiotrophin 1
hsa-miR-4690-5p	down	DAGLA	diacylglycerol lipase, alpha
hsa-miR-4690-5p	down	DGKZ	diacylglycerol kinase, zeta
hsa-miR-4690-5p	down	DIAPH1	diaphanous homolog 1 (Drosophila)
hsa-miR-4690-5p	down	DPYSL5	dihydropyrimidinase-like 5
hsa-miR-4690-5p	down	E2F2	E2F transcription factor 2
hsa-miR-4690-5p	down	EHD3	EH-domain containing 3
hsa-miR-4690-5p	down	FGF14	fibroblast growth factor 14
hsa-miR-4690-5p	down	GNAI2	guanine nucleotide binding protein (G protein), alpha inhibiting activity polypeptide 2
hsa-miR-4690-5p	down	HPSE2	heparanase 2
hsa-miR-4690-5p	down	HTR2C	5-hydroxytryptamine (serotonin) receptor 2C, G protein-coupled
hsa-miR-4690-5p	down	LAPTM5	lysosomal protein transmembrane 5
hsa-miR-4690-5p	down	LPCAT3	lysophosphatidylcholine acyltransferase 3
hsa-miR-4690-5p	down	LRP1	low density lipoprotein receptor-related protein 1
hsa-miR-4690-5p	down	MAPK9	mitogen-activated protein kinase 9
hsa-miR-4690-5p	down	MED8	mediator complex subunit 8
hsa-miR-4690-5p	down	MTHFR	methylenetetrahydrofolate reductase (NAD(P)H)
hsa-miR-4690-5p	down	MYLK3	myosin light chain kinase 3
hsa-miR-4690-5p	down	NEO1	neogenin 1
hsa-miR-4690-5p	down	NTNG1	netrin G1
hsa-miR-4690-5p	down	NTRK2	neurotrophic tyrosine kinase, receptor, type 2
hsa-miR-4690-5p	down	PAX8	paired box 8
hsa-miR-4690-5p	down	PDE1B	phosphodiesterase 1B, calmodulin-dependent
hsa-miR-4690-5p	down	POLR3D	polymerase (RNA) III (DNA directed) polypeptide D, 44kDa
hsa-miR-4690-5p	down	PPM1A	protein phosphatase, Mg2+/Mn2+ dependent, 1A
hsa-miR-4690-5p	down	PPP2CB	protein phosphatase 2, catalytic subunit, beta isozyme
hsa-miR-4690-5p	down	PRKCB	protein kinase C, beta
hsa-miR-4690-5p	down	RORA	RAR-related orphan receptor A
hsa-miR-4690-5p	down	SEC24C	SEC24 family, member C (S. cerevisiae)
hsa-miR-4690-5p	down	SLC2A1	solute carrier family 2 (facilitated glucose transporter), member 1
hsa-miR-4690-5p	down	SLIT1	slit homolog 1 (Drosophila)
hsa-miR-4690-5p	down	STX7	syntaxin 7
hsa-miR-4690-5p	down	TAF15	TAF15 RNA polymerase II, TATA box binding protein (TBP)-associated factor, 68kDa
hsa-miR-4690-5p	down	TBL1XR1	transducin (beta)-like 1 X-linked receptor 1
hsa-miR-4690-5p	down	TPM1	tropomyosin 1 (alpha)
hsa-miR-4690-5p	down	TPM3	tropomyosin 3
hsa-miR-4690-5p	down	VAPA	VAMP (vesicle-associated membrane protein)-associated protein A, 33kDa
hsa-miR-4690-5p	down	VCP	valosin containing protein
hsa-miR-4690-5p	down	VTI1A	vesicle transport through interaction with t-SNAREs homolog 1A (yeast)
hsa-miR-4734	up	DUSP8	dual specificity phosphatase 8
hsa-miR-4734	up	GRIN1	glutamate receptor, ionotropic, N-methyl D-aspartate 1
hsa-miR-4734	up	OPRL1	opiate receptor-like 1
hsa-miR-4734	up	RARA	retinoic acid receptor, alpha
hsa-miR-6510-5p	down	ABCA2	ATP-binding cassette, sub-family A (ABC1), member 2
hsa-miR-6510-5p	down	AFF1	AF4/FMR2 family, member 1
hsa-miR-6510-5p	down	BCL2L11	BCL2-like 11 (apoptosis facilitator)
hsa-miR-6510-5p	down	CD34	CD34 molecule
hsa-miR-6510-5p	down	CHRM1	cholinergic receptor, muscarinic 1
hsa-miR-6510-5p	down	CHRNE	cholinergic receptor, nicotinic, epsilon (muscle)
hsa-miR-6510-5p	down	CYBRD1	cytochrome b reductase 1
hsa-miR-6510-5p	down	DIAPH1	diaphanous homolog 1 (Drosophila)
hsa-miR-6510-5p	down	DNAJB2	DnaJ (Hsp40) homolog, subfamily B, member 2
hsa-miR-6510-5p	down	EDC3	enhancer of mRNA decapping 3 homolog (S. cerevisiae)
hsa-miR-6510-5p	down	EFNA5	ephrin-A5
hsa-miR-6510-5p	down	EHD2	EH-domain containing 2
hsa-miR-6510-5p	down	FZD4	frizzled family receptor 4
hsa-miR-6510-5p	down	IGF1	insulin-like growth factor 1 (somatomedin C)
hsa-miR-6510-5p	down	IRF1	interferon regulatory factor 1
hsa-miR-6510-5p	down	ITCH	itchy E3 ubiquitin protein ligase
hsa-miR-6510-5p	down	KCNJ10	potassium inwardly-rectifying channel, subfamily J, member 10
hsa-miR-6510-5p	down	LMNA	lamin A/C
hsa-miR-6510-5p	down	NFKBIE	nuclear factor of kappa light polypeptide gene enhancer in B-cells inhibitor, epsilon
hsa-miR-6510-5p	down	NTRK3	neurotrophic tyrosine kinase, receptor, type 3
hsa-miR-6510-5p	down	PAFAH1B1	platelet-activating factor acetylhydrolase 1b, regulatory subunit 1 (45kDa)
hsa-miR-6510-5p	down	PCYT1B	phosphate cytidylyltransferase 1, choline, beta
hsa-miR-6510-5p	down	PDE6G	phosphodiesterase 6G, cGMP-specific, rod, gamma
hsa-miR-6510-5p	down	PDGFA	platelet-derived growth factor alpha polypeptide
hsa-miR-6510-5p	down	PIGA	phosphatidylinositol glycan anchor biosynthesis, class A
hsa-miR-6510-5p	down	RHOBTB2	Rho-related BTB domain containing 2
hsa-miR-6510-5p	down	SCNN1A	sodium channel, non-voltage-gated 1 alpha subunit
hsa-miR-6510-5p	down	SEC24C	SEC24 family, member C (S. cerevisiae)
hsa-miR-6510-5p	down	SFN	stratifin
hsa-miR-6510-5p	down	SHANK3	SH3 and multiple ankyrin repeat domains 3
hsa-miR-6510-5p	down	SMG5	smg-5 homolog, nonsense mediated mRNA decay factor (C. elegans)
hsa-miR-6510-5p	down	STX1B	syntaxin 1B
hsa-miR-6510-5p	down	SUV39H1	suppressor of variegation 3-9 homolog 1 (Drosophila)
hsa-miR-6510-5p	down	TNFSF13	tumor necrosis factor (ligand) superfamily, member 13
hsa-miR-6510-5p	down	WDR33	WD repeat domain 33
hsa-miR-6510-5p	down	ZMAT3	zinc finger, matrin-type 3
hsa-miR-7150	down	ALDH7A1	aldehyde dehydrogenase 7 family, member A1
hsa-miR-7150	down	ARC	activity-regulated cytoskeleton-associated protein
hsa-miR-7150	down	AXIN1	axin 1
hsa-miR-7150	down	B4GALNT1	beta-1,4-N-acetyl-galactosaminyl transferase 1
hsa-miR-7150	down	CAMK2A	calcium/calmodulin-dependent protein kinase II alpha
hsa-miR-7150	down	CFL1	cofilin 1 (non-muscle)
hsa-miR-7150	down	CLDN19	claudin 19
hsa-miR-7150	down	CNTN2	contactin 2 (axonal)
hsa-miR-7150	down	CSNK1G1	casein kinase 1, gamma 1
hsa-miR-7150	down	CYP27B1	cytochrome P450, family 27, subfamily B, polypeptide 1
hsa-miR-7150	down	DAGLA	diacylglycerol lipase, alpha
hsa-miR-7150	down	DDX3X	DEAD (Asp-Glu-Ala-Asp) box polypeptide 3, X-linked
hsa-miR-7150	down	DGKA	diacylglycerol kinase, alpha 80kDa
hsa-miR-7150	down	DNMT3A	DNA (cytosine-5-)-methyltransferase 3 alpha
hsa-miR-7150	down	DTX3L	deltex 3-like (Drosophila)
hsa-miR-7150	down	EGLN2	egl nine homolog 2 (C. elegans)
hsa-miR-7150	down	EI24	etoposide induced 2.4 mRNA
hsa-miR-7150	down	EP300	E1A binding protein p300
hsa-miR-7150	down	ETV6	ets variant 6
hsa-miR-7150	down	FOSB	FBJ murine osteosarcoma viral oncogene homolog B
hsa-miR-7150	down	GABRA3	gamma-aminobutyric acid (GABA) A receptor, alpha 3
hsa-miR-7150	down	GALNT10	UDP-N-acetyl-alpha-D-galactosamine:polypeptide N-acetylgalactosaminyltransferase 10 (GalNAc-T10)
hsa-miR-7150	down	GNG12	guanine nucleotide binding protein (G protein), gamma 12
hsa-miR-7150	down	HBEGF	heparin-binding EGF-like growth factor
hsa-miR-7150	down	HMGCL	3-hydroxymethyl-3-methylglutaryl-CoA lyase
hsa-miR-7150	down	HS2ST1	heparan sulfate 2-O-sulfotransferase 1
hsa-miR-7150	down	INPP5K	inositol polyphosphate-5-phosphatase K
hsa-miR-7150	down	KDM6A	lysine (K)-specific demethylase 6A
hsa-miR-7150	down	MAP2K4	mitogen-activated protein kinase kinase 4
hsa-miR-7150	down	MYLK4	myosin light chain kinase family, member 4
hsa-miR-7150	down	NFASC	neurofascin
hsa-miR-7150	down	NTRK3	neurotrophic tyrosine kinase, receptor, type 3
hsa-miR-7150	down	NUMBL	numb homolog (Drosophila)-like
hsa-miR-7150	down	PDE4B	phosphodiesterase 4B, cAMP-specific
hsa-miR-7150	down	PDPK1	3-phosphoinositide dependent protein kinase-1
hsa-miR-7150	down	PFKFB2	6-phosphofructo-2-kinase/fructose-2,6-biphosphatase 2
hsa-miR-7150	down	PLCB3	phospholipase C, beta 3 (phosphatidylinositol-specific)
hsa-miR-7150	down	PLCG1	phospholipase C, gamma 1
hsa-miR-7150	down	PPARGC1A	peroxisome proliferator-activated receptor gamma, coactivator 1 alpha
hsa-miR-7150	down	PRKACA	protein kinase, cAMP-dependent, catalytic, alpha
hsa-miR-7150	down	S1PR2	sphingosine-1-phosphate receptor 2
hsa-miR-7150	down	SEL1L	sel-1 suppressor of lin-12-like (C. elegans)
hsa-miR-7150	down	SEPT6	septin 6
hsa-miR-7150	down	SETD1A	SET domain containing 1A
hsa-miR-7150	down	SRC	v-src sarcoma (Schmidt-Ruppin A-2) viral oncogene homolog (avian)
hsa-miR-7150	down	SSH2	slingshot homolog 2 (Drosophila)
hsa-miR-7150	down	ST6GALNAC4	ST6 (alpha-N-acetyl-neuraminyl-2,3-beta-galactosyl-1,3)-N-acetylgalactosaminide alpha-2,6-sialyltransferase 4
hsa-miR-7150	down	STAG1	stromal antigen 1
hsa-miR-7150	down	STAT2	signal transducer and activator of transcription 2, 113kDa
hsa-miR-7150	down	STAT6	signal transducer and activator of transcription 6, interleukin-4 induced
hsa-miR-7150	down	SUFU	suppressor of fused homolog (Drosophila)
hsa-miR-7150	down	TCF7L1	transcription factor 7-like 1 (T-cell specific, HMG-box)
hsa-miR-7150	down	TEAD1	TEA domain family member 1 (SV40 transcriptional enhancer factor)
hsa-miR-7150	down	TLN1	talin 1
hsa-miR-7150	down	TP73	tumor protein p73
hsa-miR-7150	down	UBE2Z	ubiquitin-conjugating enzyme E2Z
hsa-miR-7-5p	up	ABI2	abl-interactor 2
hsa-miR-7-5p	up	ADCY9	adenylate cyclase 9
hsa-miR-7-5p	up	AGPS	alkylglycerone phosphate synthase
hsa-miR-7-5p	up	ATP2B2	ATPase, Ca++ transporting, plasma membrane 2
hsa-miR-7-5p	up	BACE1	beta-site APP-cleaving enzyme 1
hsa-miR-7-5p	up	BCR	breakpoint cluster region
hsa-miR-7-5p	up	BMPR2	bone morphogenetic protein receptor, type II (serine/threonine kinase)
hsa-miR-7-5p	up	BRCA1	breast cancer 1, early onset
hsa-miR-7-5p	up	CACNB4	calcium channel, voltage-dependent, beta 4 subunit
hsa-miR-7-5p	up	CAMK2D	calcium/calmodulin-dependent protein kinase II delta
hsa-miR-7-5p	up	CCNT2	cyclin T2
hsa-miR-7-5p	up	CDC14B	CDC14 cell division cycle 14 homolog B (S. cerevisiae)
hsa-miR-7-5p	up	CKAP4	cytoskeleton-associated protein 4
hsa-miR-7-5p	up	CNOT8	CCR4-NOT transcription complex, subunit 8
hsa-miR-7-5p	up	CRLS1	cardiolipin synthase 1
hsa-miR-7-5p	up	CRY2	cryptochrome 2 (photolyase-like)
hsa-miR-7-5p	up	CTSB	cathepsin B
hsa-miR-7-5p	up	CUL5	cullin 5
hsa-miR-7-5p	up	DPYSL2	dihydropyrimidinase-like 2
hsa-miR-7-5p	up	EGFR	epidermal growth factor receptor
hsa-miR-7-5p	up	EIF2AK1	eukaryotic translation initiation factor 2-alpha kinase 1
hsa-miR-7-5p	up	EXOSC2	exosome component 2
hsa-miR-7-5p	up	GABRA1	gamma-aminobutyric acid (GABA) A receptor, alpha 1
hsa-miR-7-5p	up	GRIN2A	glutamate receptor, ionotropic, N-methyl D-aspartate 2A
hsa-miR-7-5p	up	GSPT1	G1 to S phase transition 1
hsa-miR-7-5p	up	IDE	insulin-degrading enzyme
hsa-miR-7-5p	up	IDS	iduronate 2-sulfatase
hsa-miR-7-5p	up	IGF1R	insulin-like growth factor 1 receptor
hsa-miR-7-5p	up	IRS1	insulin receptor substrate 1
hsa-miR-7-5p	up	IRS2	insulin receptor substrate 2
hsa-miR-7-5p	up	ITGB8	integrin, beta 8
hsa-miR-7-5p	up	ITPKC	inositol-trisphosphate 3-kinase C
hsa-miR-7-5p	up	KPNA1	karyopherin alpha 1 (importin alpha 5)
hsa-miR-7-5p	up	LIMD1	LIM domains containing 1
hsa-miR-7-5p	up	MKNK1	MAP kinase interacting serine/threonine kinase 1
hsa-miR-7-5p	up	NDUFA4	NADH dehydrogenase (ubiquinone) 1 alpha subcomplex, 4, 9kDa
hsa-miR-7-5p	up	NR4A3	nuclear receptor subfamily 4, group A, member 3
hsa-miR-7-5p	up	NXT2	nuclear transport factor 2-like export factor 2
hsa-miR-7-5p	up	PAN2	PAN2 poly(A) specific ribonuclease subunit homolog (S. cerevisiae)
hsa-miR-7-5p	up	PDE4A	phosphodiesterase 4A, cAMP-specific
hsa-miR-7-5p	up	PDE4B	phosphodiesterase 4B, cAMP-specific
hsa-miR-7-5p	up	PFN2	profilin 2
hsa-miR-7-5p	up	PIK3CD	phosphoinositide-3-kinase, catalytic, delta polypeptide
hsa-miR-7-5p	up	PIK3R3	phosphoinositide-3-kinase, regulatory subunit 3 (gamma)
hsa-miR-7-5p	up	PIM1	pim-1 oncogene
hsa-miR-7-5p	up	PKP2	plakophilin 2
hsa-miR-7-5p	up	PRKCB	protein kinase C, beta
hsa-miR-7-5p	up	PSEN1	presenilin 1
hsa-miR-7-5p	up	PSME3	proteasome (prosome, macropain) activator subunit 3 (PA28 gamma; Ki)
hsa-miR-7-5p	up	RAB11FIP4	RAB11 family interacting protein 4 (class II)
hsa-miR-7-5p	up	RRAS2	related RAS viral (r-ras) oncogene homolog 2
hsa-miR-7-5p	up	SGK1	serum/glucocorticoid regulated kinase 1
hsa-miR-7-5p	up	SH3GLB1	SH3-domain GRB2-like endophilin B1
hsa-miR-7-5p	up	SHANK2	SH3 and multiple ankyrin repeat domains 2
hsa-miR-7-5p	up	SIN3A	SIN3 transcription regulator homolog A (yeast)
hsa-miR-7-5p	up	SKP1	S-phase kinase-associated protein 1
hsa-miR-7-5p	up	SLC12A2	solute carrier family 12 (sodium/potassium/chloride transporters), member 2
hsa-miR-7-5p	up	SLC38A2	solute carrier family 38, member 2
hsa-miR-7-5p	up	SLC4A4	solute carrier family 4, sodium bicarbonate cotransporter, member 4
hsa-miR-7-5p	up	SLIT1	slit homolog 1 (Drosophila)
hsa-miR-7-5p	up	SMG1	smg-1 homolog, phosphatidylinositol 3-kinase-related kinase (C. elegans)
hsa-miR-7-5p	up	SNCA	synuclein, alpha (non A4 component of amyloid precursor)
hsa-miR-7-5p	up	SORT1	sortilin 1
hsa-miR-7-5p	up	SP1	Sp1 transcription factor
hsa-miR-7-5p	up	STK11	serine/threonine kinase 11
hsa-miR-7-5p	up	TFRC	transferrin receptor (p90, CD71)
hsa-miR-7-5p	up	UBQLN4	ubiquilin 4
hsa-miR-7-5p	up	WASF3	WAS protein family, member 3
hsa-miR-7-5p	up	WDR82	WD repeat domain 82
hsa-miR-7-5p	up	XIAP	X-linked inhibitor of apoptosis
hsa-miR-762	up	ACP2	acid phosphatase 2, lysosomal
hsa-miR-762	up	ACVR1B	activin A receptor, type IB
hsa-miR-762	up	AGAP2	ArfGAP with GTPase domain, ankyrin repeat and PH domain 2
hsa-miR-762	up	AK1	adenylate kinase 1
hsa-miR-762	up	CACNB3	calcium channel, voltage-dependent, beta 3 subunit
hsa-miR-762	up	CALM3	calmodulin 3 (phosphorylase kinase, delta)
hsa-miR-762	up	CAMK2G	calcium/calmodulin-dependent protein kinase II gamma
hsa-miR-762	up	CDK6	cyclin-dependent kinase 6
hsa-miR-762	up	CRTC1	CREB regulated transcription coactivator 1
hsa-miR-762	up	CRTC2	CREB regulated transcription coactivator 2
hsa-miR-762	up	CX3CL1	chemokine (C-X3-C motif) ligand 1
hsa-miR-762	up	DPYSL5	dihydropyrimidinase-like 5
hsa-miR-762	up	ELK1	ELK1, member of ETS oncogene family
hsa-miR-762	up	ENTPD2	ectonucleoside triphosphate diphosphohydrolase 2
hsa-miR-762	up	EPHA8	EPH receptor A8
hsa-miR-762	up	EPHB3	EPH receptor B3
hsa-miR-762	up	FBXO2	F-box protein 2
hsa-miR-762	up	FGFR1	fibroblast growth factor receptor 1
hsa-miR-762	up	FLT1	fms-related tyrosine kinase 1 (vascular endothelial growth factor/vascular permeability factor receptor)
hsa-miR-762	up	GAB2	GRB2-associated binding protein 2
hsa-miR-762	up	GGA1	golgi-associated, gamma adaptin ear containing, ARF binding protein 1
hsa-miR-762	up	GIT1	G protein-coupled receptor kinase interacting ArfGAP 1
hsa-miR-762	up	GNAI2	guanine nucleotide binding protein (G protein), alpha inhibiting activity polypeptide 2
hsa-miR-762	up	GRM2	glutamate receptor, metabotropic 2
hsa-miR-762	up	IL2RB	interleukin 2 receptor, beta
hsa-miR-762	up	IQSEC2	IQ motif and Sec7 domain 2
hsa-miR-762	up	ITCH	itchy E3 ubiquitin protein ligase
hsa-miR-762	up	ITGA5	integrin, alpha 5 (fibronectin receptor, alpha polypeptide)
hsa-miR-762	up	KCNN4	potassium intermediate/small conductance calcium-activated channel, subfamily N, member 4
hsa-miR-762	up	KCNQ1	potassium voltage-gated channel, KQT-like subfamily, member 1
hsa-miR-762	up	KLC2	kinesin light chain 2
hsa-miR-762	up	LAPTM5	lysosomal protein transmembrane 5
hsa-miR-762	up	MAML1	mastermind-like 1 (Drosophila)
hsa-miR-762	up	MMP14	matrix metallopeptidase 14 (membrane-inserted)
hsa-miR-762	up	MRAS	muscle RAS oncogene homolog
hsa-miR-762	up	MYBL2	v-myb myeloblastosis viral oncogene homolog (avian)-like 2
hsa-miR-762	up	MYLK2	myosin light chain kinase 2
hsa-miR-762	up	NCSTN	nicastrin
hsa-miR-762	up	NME4	non-metastatic cells 4, protein expressed in
hsa-miR-762	up	NPLOC4	nuclear protein localization 4 homolog (S. cerevisiae)
hsa-miR-762	up	NTN1	netrin 1
hsa-miR-762	up	NTRK3	neurotrophic tyrosine kinase, receptor, type 3
hsa-miR-762	up	PAX5	paired box 5
hsa-miR-762	up	PDE1B	phosphodiesterase 1B, calmodulin-dependent
hsa-miR-762	up	PFKFB4	6-phosphofructo-2-kinase/fructose-2,6-biphosphatase 4
hsa-miR-762	up	PHKG2	phosphorylase kinase, gamma 2 (testis)
hsa-miR-762	up	PIK3R5	phosphoinositide-3-kinase, regulatory subunit 5
hsa-miR-762	up	PLCD3	phospholipase C, delta 3
hsa-miR-762	up	PLD2	phospholipase D2
hsa-miR-762	up	PLEKHO2	pleckstrin homology domain containing, family O member 2
hsa-miR-762	up	PLXNA1	plexin A1
hsa-miR-762	up	PPP2R5E	protein phosphatase 2, regulatory subunit B', epsilon isoform
hsa-miR-762	up	PVRL1	poliovirus receptor-related 1 (herpesvirus entry mediator C)
hsa-miR-762	up	PVRL2	poliovirus receptor-related 2 (herpesvirus entry mediator B)
hsa-miR-762	up	RAB11FIP5	RAB11 family interacting protein 5 (class I)
hsa-miR-762	up	RALGDS	ral guanine nucleotide dissociation stimulator
hsa-miR-762	up	RARA	retinoic acid receptor, alpha
hsa-miR-762	up	RASGRF1	Ras protein-specific guanine nucleotide-releasing factor 1
hsa-miR-762	up	RUNX1T1	runt-related transcription factor 1; translocated to, 1 (cyclin D-related)
hsa-miR-762	up	SEMA4G	sema domain, immunoglobulin domain (Ig), transmembrane domain (TM) and short cytoplasmic domain, (semaphorin) 4G
hsa-miR-762	up	SEPT6	septin 6
hsa-miR-762	up	SHANK2	SH3 and multiple ankyrin repeat domains 2
hsa-miR-762	up	SLC22A8	solute carrier family 22 (organic anion transporter), member 8
hsa-miR-762	up	SLC2A1	solute carrier family 2 (facilitated glucose transporter), member 1
hsa-miR-762	up	SLC38A5	solute carrier family 38, member 5
hsa-miR-762	up	SUFU	suppressor of fused homolog (Drosophila)
hsa-miR-762	up	SUPT3H	suppressor of Ty 3 homolog (S. cerevisiae)
hsa-miR-762	up	TFAP4	transcription factor AP-4 (activating enhancer binding protein 4)
hsa-miR-762	up	TOB2	transducer of ERBB2, 2
hsa-miR-762	up	UNC5A	unc-5 homolog A (C. elegans)
hsa-miR-762	up	VDR	vitamin D (1,25- dihydroxyvitamin D3) receptor
hsa-miR-762	up	VIPR1	vasoactive intestinal peptide receptor 1
hsa-miR-762	up	VPS37D	vacuolar protein sorting 37 homolog D (S. cerevisiae)
hsa-miR-7704	up	DAGLA	diacylglycerol lipase, alpha
hsa-miR-92b-3p	up	AFF1	AF4/FMR2 family, member 1
hsa-miR-92b-3p	up	ANK3	ankyrin 3, node of Ranvier (ankyrin G)
hsa-miR-92b-3p	up	ATP7A	ATPase, Cu++ transporting, alpha polypeptide
hsa-miR-92b-3p	up	BTG2	BTG family, member 2
hsa-miR-92b-3p	up	CACNA1I	calcium channel, voltage-dependent, T type, alpha 1I subunit
hsa-miR-92b-3p	up	CCNE2	cyclin E2
hsa-miR-92b-3p	up	CHMP7	charged multivesicular body protein 7
hsa-miR-92b-3p	up	CREB3L2	cAMP responsive element binding protein 3-like 2
hsa-miR-92b-3p	up	DCP1A	DCP1 decapping enzyme homolog A (S. cerevisiae)
hsa-miR-92b-3p	up	DCP2	DCP2 decapping enzyme homolog (S. cerevisiae)
hsa-miR-92b-3p	up	DNAJB12	DnaJ (Hsp40) homolog, subfamily B, member 12
hsa-miR-92b-3p	up	FOSL2	FOS-like antigen 2
hsa-miR-92b-3p	up	GNS	glucosamine (N-acetyl)-6-sulfatase
hsa-miR-92b-3p	up	ITGA5	integrin, alpha 5 (fibronectin receptor, alpha polypeptide)
hsa-miR-92b-3p	up	LAMP2	lysosomal-associated membrane protein 2
hsa-miR-92b-3p	up	MGLL	monoglyceride lipase
hsa-miR-92b-3p	up	NF1	neurofibromin 1
hsa-miR-92b-3p	up	NF2	neurofibromin 2 (merlin)
hsa-miR-92b-3p	up	NOTCH1	notch 1
hsa-miR-92b-3p	up	NSF	N-ethylmaleimide-sensitive factor
hsa-miR-92b-3p	up	PIP5K1C	phosphatidylinositol-4-phosphate 5-kinase, type I, gamma
hsa-miR-92b-3p	up	PPAP2B	phosphatidic acid phosphatase type 2B
hsa-miR-92b-3p	up	RAD21	RAD21 homolog (S. pombe)
hsa-miR-92b-3p	up	RRBP1	ribosome binding protein 1 homolog 180kDa (dog)
hsa-miR-92b-3p	up	SDC2	syndecan 2
hsa-miR-92b-3p	up	SGK1	serum/glucocorticoid regulated kinase 1
hsa-miR-92b-3p	up	SLC12A5	solute carrier family 12 (potassium/chloride transporter), member 5
hsa-miR-92b-3p	up	SLC17A6	solute carrier family 17 (sodium-dependent inorganic phosphate cotransporter), member 6
hsa-miR-92b-3p	up	SLC6A1	solute carrier family 6 (neurotransmitter transporter, GABA), member 1
hsa-miR-92b-3p	up	SLC9A1	solute carrier family 9, subfamily A (NHE1, cation proton antiporter 1), member 1
hsa-miR-92b-3p	up	VCL	vinculin
The first tab reveals miRNA-gene association; the second tab shows miRNA-gene characteristic.
miRNA, microRNA.

## Sheet: miRNA-gene characteristic
Gene symbol	Description	Degree		microRNA	style	Degree
GDA	guanine deaminase	2		hsa-let-7a-5p	down	119
OSMR	oncostatin M receptor	1		hsa-let-7i-5p	down	108
PGAM1	phosphoglycerate mutase 1 (brain)	1		hsa-miR-106a-5p	up	162
RORA	RAR-related orphan receptor A	4		hsa-miR-1246	down	9
CUL3	cullin 3	3		hsa-miR-142-5p	down	6
CUL5	cullin 5	1		hsa-miR-146a-5p	down	17
TAF5L	TAF5-like RNA polymerase II, p300/CBP-associated factor (PCAF)-associated factor, 65kDa	1		hsa-miR-149-3p	down	112
LTB4R	leukotriene B4 receptor	1		hsa-miR-150-5p	up	33
MAP3K8	mitogen-activated protein kinase kinase kinase 8	2		hsa-miR-17-5p	up	160
SERPINE1	serpin peptidase inhibitor, clade E (nexin, plasminogen activator inhibitor type 1), member 1	1		hsa-miR-22-3p	up	62
STAG2	stromal antigen 2	1		hsa-miR-27b-3p	down	114
STAG1	stromal antigen 1	2		hsa-miR-30c-5p	down	61
ARC	activity-regulated cytoskeleton-associated protein	2		hsa-miR-374b-5p	down	6
GATM	glycine amidinotransferase (L-arginine:glycine amidinotransferase)	1		hsa-miR-4267	up	15
KIF5A	kinesin family member 5A	2		hsa-miR-4443	up	11
MYLK3	myosin light chain kinase 3	1		hsa-miR-4690-5p	down	47
PIK3CD	phosphoinositide-3-kinase, catalytic, delta polypeptide	2		hsa-miR-4734	up	4
MYLK4	myosin light chain kinase family, member 4	1		hsa-miR-6510-5p	down	36
GRIN2A	glutamate receptor, ionotropic, N-methyl D-aspartate 2A	2		hsa-miR-7150	down	56
MYLK2	myosin light chain kinase 2	1		hsa-miR-7-5p	up	70
ESPL1	extra spindle pole bodies homolog 1 (S. cerevisiae)	2		hsa-miR-762	up	73
LPCAT3	lysophosphatidylcholine acyltransferase 3	1		hsa-miR-7704	up	1
EIF2AK1	eukaryotic translation initiation factor 2-alpha kinase 1	1		hsa-miR-92b-3p	up	31
BACE2	beta-site APP-cleaving enzyme 2	1
BACE1	beta-site APP-cleaving enzyme 1	1
MC2R	melanocortin 2 receptor (adrenocorticotropic hormone)	1
MAPK9	mitogen-activated protein kinase 9	3
PPP2R5E	protein phosphatase 2, regulatory subunit B', epsilon isoform	1
CRTC3	CREB regulated transcription coactivator 3	2
CRTC2	CREB regulated transcription coactivator 2	1
RAD23B	RAD23 homolog B (S. cerevisiae)	3
SCN1A	sodium channel, voltage-gated, type I, alpha subunit	1
PPP2R3A	protein phosphatase 2, regulatory subunit B'', alpha	2
NFKBIE	nuclear factor of kappa light polypeptide gene enhancer in B-cells inhibitor, epsilon	1
CRTC1	CREB regulated transcription coactivator 1	2
CACNB1	calcium channel, voltage-dependent, beta 1 subunit	2
CACNB3	calcium channel, voltage-dependent, beta 3 subunit	1
CACNB4	calcium channel, voltage-dependent, beta 4 subunit	1
MYBL2	v-myb myeloblastosis viral oncogene homolog (avian)-like 2	1
PFN2	profilin 2	3
LPCAT1	lysophosphatidylcholine acyltransferase 1	1
DUSP16	dual specificity phosphatase 16	2
LAPTM4B	lysosomal protein transmembrane 4 beta	1
LAPTM4A	lysosomal protein transmembrane 4 alpha	2
TAOK2	TAO kinase 2	2
ACER2	alkaline ceramidase 2	2
TAOK3	TAO kinase 3	2
NXF1	nuclear RNA export factor 1	1
EI24	etoposide induced 2.4 mRNA	1
PKP2	plakophilin 2	1
GK	glycerol kinase	1
OPRM1	opioid receptor, mu 1	1
FGF8	fibroblast growth factor 8 (androgen-induced)	1
FGF7	fibroblast growth factor 7	1
LDLR	low density lipoprotein receptor	2
UBE2G1	ubiquitin-conjugating enzyme E2G 1	1
UBE2G2	ubiquitin-conjugating enzyme E2G 2	2
ST6GALNAC3	ST6 (alpha-N-acetyl-neuraminyl-2,3-beta-galactosyl-1,3)-N-acetylgalactosaminide alpha-2,6-sialyltransferase 3	1
ST6GALNAC4	ST6 (alpha-N-acetyl-neuraminyl-2,3-beta-galactosyl-1,3)-N-acetylgalactosaminide alpha-2,6-sialyltransferase 4	1
SMAP1	small ArfGAP 1	1
IL1RAP	interleukin 1 receptor accessory protein	2
BHLHE41	basic helix-loop-helix family, member e41	1
PHKG2	phosphorylase kinase, gamma 2 (testis)	1
SLC22A8	solute carrier family 22 (organic anion transporter), member 8	1
TP53	tumor protein p53	3
ARHGEF12	Rho guanine nucleotide exchange factor (GEF) 12	1
MMP14	matrix metallopeptidase 14 (membrane-inserted)	2
MYCN	v-myc myelocytomatosis viral related oncogene, neuroblastoma derived (avian)	2
ARHGEF11	Rho guanine nucleotide exchange factor (GEF) 11	2
TAF10	TAF10 RNA polymerase II, TATA box binding protein (TBP)-associated factor, 30kDa	1
TAF15	TAF15 RNA polymerase II, TATA box binding protein (TBP)-associated factor, 68kDa	1
EREG	epiregulin	2
SORT1	sortilin 1	2
SNAP29	synaptosomal-associated protein, 29kDa	1
APC2	adenomatosis polyposis coli 2	1
ABI2	abl-interactor 2	1
MKNK1	MAP kinase interacting serine/threonine kinase 1	1
SORBS1	sorbin and SH3 domain containing 1	1
ACSL4	acyl-CoA synthetase long-chain family member 4	2
PDHX	pyruvate dehydrogenase complex, component X	1
ACSL6	acyl-CoA synthetase long-chain family member 6	1
ACSL5	acyl-CoA synthetase long-chain family member 5	1
PDK1	pyruvate dehydrogenase kinase, isozyme 1	1
SLC8A2	solute carrier family 8 (sodium/calcium exchanger), member 2	1
IL8	interleukin 8	1
OPRL1	opiate receptor-like 1	1
NTNG1	netrin G1	1
LMNA	lamin A/C	1
IGF1	insulin-like growth factor 1 (somatomedin C)	2
ETF1	eukaryotic translation termination factor 1	1
TP73	tumor protein p73	1
NRAS	neuroblastoma RAS viral (v-ras) oncogene homolog	2
DUSP2	dual specificity phosphatase 2	1
LRP1	low density lipoprotein receptor-related protein 1	1
TFRC	transferrin receptor (p90, CD71)	1
GSK3A	glycogen synthase kinase 3 alpha	1
GSK3B	glycogen synthase kinase 3 beta	1
RAB22A	RAB22A, member RAS oncogene family	2
LRP6	low density lipoprotein receptor-related protein 6	2
AMOT	angiomotin	2
DUSP8	dual specificity phosphatase 8	1
NCBP2	nuclear cap binding protein subunit 2, 20kDa	1
AP4E1	adaptor-related protein complex 4, epsilon 1 subunit	1
IDE	insulin-degrading enzyme	2
LRRC4B	leucine rich repeat containing 4B	1
GRIK5	glutamate receptor, ionotropic, kainate 5	1
IL13	interleukin 13	2
IL10	interleukin 10	1
IDS	iduronate 2-sulfatase	1
RALB	v-ral simian leukemia viral oncogene homolog B (ras related; GTP binding protein)	2
FRS2	fibroblast growth factor receptor substrate 2	1
PDXP	pyridoxal (pyridoxine, vitamin B6) phosphatase	1
STIM2	stromal interaction molecule 2	2
IL25	interleukin 25	2
STIM1	stromal interaction molecule 1	1
CCDC6	coiled-coil domain containing 6	1
EP300	E1A binding protein p300	1
HIF1A	hypoxia inducible factor 1, alpha subunit (basic helix-loop-helix transcription factor)	1
RELT	RELT tumor necrosis factor receptor	1
VAMP2	vesicle-associated membrane protein 2 (synaptobrevin 2)	1
EDA	ectodysplasin A	1
VAMP1	vesicle-associated membrane protein 1 (synaptobrevin 1)	1
CCL1	chemokine (C-C motif) ligand 1	1
FGD1	FYVE, RhoGEF and PH domain containing 1	1
ARFGAP2	ADP-ribosylation factor GTPase activating protein 2	1
RAB7A	RAB7A, member RAS oncogene family	1
ADORA2B	adenosine A2b receptor	1
SETD1A	SET domain containing 1A	1
TFE3	transcription factor binding to IGHM enhancer 3	1
MAPKAPK3	mitogen-activated protein kinase-activated protein kinase 3	1
BMPR2	bone morphogenetic protein receptor, type II (serine/threonine kinase)	3
ABCA2	ATP-binding cassette, sub-family A (ABC1), member 2	1
STIP1	stress-induced-phosphoprotein 1	1
ABCA1	ATP-binding cassette, sub-family A (ABC1), member 1	1
ARPC5	actin related protein 2/3 complex, subunit 5, 16kDa	1
CCL5	chemokine (C-C motif) ligand 5	1
FBXW7	F-box and WD repeat domain containing 7, E3 ubiquitin protein ligase	2
ICOS	inducible T-cell co-stimulator	2
ABCB9	ATP-binding cassette, sub-family B (MDR/TAP), member 9	2
GRIN1	glutamate receptor, ionotropic, N-methyl D-aspartate 1	2
NTN4	netrin 4	2
TEAD1	TEA domain family member 1 (SV40 transcriptional enhancer factor)	1
NR4A3	nuclear receptor subfamily 4, group A, member 3	3
FURIN	furin (paired basic amino acid cleaving enzyme)	3
NTN1	netrin 1	4
ATP7A	ATPase, Cu++ transporting, alpha polypeptide	1
P2RX4	purinergic receptor P2X, ligand-gated ion channel, 4	2
IKBKE	inhibitor of kappa light polypeptide gene enhancer in B-cells, kinase epsilon	2
HDAC4	histone deacetylase 4	1
CDKN1A	cyclin-dependent kinase inhibitor 1A (p21, Cip1)	2
MYO10	myosin X	1
LAMP2	lysosomal-associated membrane protein 2	1
P2RX1	purinergic receptor P2X, ligand-gated ion channel, 1	1
CXCL14	chemokine (C-X-C motif) ligand 14	1
ADRA1B	adrenergic, alpha-1B-, receptor	2
DNAJB2	DnaJ (Hsp40) homolog, subfamily B, member 2	2
HDAC8	histone deacetylase 8	1
ABL2	v-abl Abelson murine leukemia viral oncogene homolog 2	4
E2F1	E2F transcription factor 1	1
E2F2	E2F transcription factor 2	5
IMPA2	inositol(myo)-1(or 4)-monophosphatase 2	1
NRG3	neuregulin 3	1
E2F5	E2F transcription factor 5, p130-binding	2
CDC14B	CDC14 cell division cycle 14 homolog B (S. cerevisiae)	2
GABBR1	gamma-aminobutyric acid (GABA) B receptor, 1	2
PAX5	paired box 5	1
GABBR2	gamma-aminobutyric acid (GABA) B receptor, 2	1
PAX3	paired box 3	1
SDC2	syndecan 2	1
SDC3	syndecan 3	1
SPRY2	sprouty homolog 2 (Drosophila)	1
MAX	MYC associated factor X	1
CASP3	caspase 3, apoptosis-related cysteine peptidase	1
SLC1A2	solute carrier family 1 (glial high affinity glutamate transporter), member 2	2
PAX8	paired box 8	1
EDC3	enhancer of mRNA decapping 3 homolog (S. cerevisiae)	1
TBL1XR1	transducin (beta)-like 1 X-linked receptor 1	1
PTGER3	prostaglandin E receptor 3 (subtype EP3)	3
PKN2	protein kinase N2	2
EDAR	ectodysplasin A receptor	1
PMM2	phosphomannomutase 2	1
MAN2A1	mannosidase, alpha, class 2A, member 1	1
CNTN2	contactin 2 (axonal)	2
JMJD1C	jumonji domain containing 1C	1
PPP2R2A	protein phosphatase 2, regulatory subunit B, alpha	1
EGLN2	egl nine homolog 2 (C. elegans)	1
UBE2R2	ubiquitin-conjugating enzyme E2R 2	1
COL9A3	collagen, type IX, alpha 3	1
EHD2	EH-domain containing 2	2
SCNN1A	sodium channel, non-voltage-gated 1 alpha subunit	1
EHD3	EH-domain containing 3	3
TNFSF4	tumor necrosis factor (ligand) superfamily, member 4	1
CBL	Cbl proto-oncogene, E3 ubiquitin protein ligase	5
NOX1	NADPH oxidase 1	1
TNFSF9	tumor necrosis factor (ligand) superfamily, member 9	1
UBE2Q2	ubiquitin-conjugating enzyme E2Q family member 2	1
PRPH2	peripherin 2 (retinal degeneration, slow)	1
COL5A2	collagen, type V, alpha 2	1
UBE2Q1	ubiquitin-conjugating enzyme E2Q family member 1	1
NCSTN	nicastrin	1
CYBB	cytochrome b-245, beta polypeptide	2
CADM3	cell adhesion molecule 3	1
GDF6	growth differentiation factor 6	3
DNAJB12	DnaJ (Hsp40) homolog, subfamily B, member 12	1
HS2ST1	heparan sulfate 2-O-sulfotransferase 1	1
ATP2B1	ATPase, Ca++ transporting, plasma membrane 1	1
ATP2B2	ATPase, Ca++ transporting, plasma membrane 2	4
WWP1	WW domain containing E3 ubiquitin protein ligase 1	1
CREB3L2	cAMP responsive element binding protein 3-like 2	1
FTL	ferritin, light polypeptide	1
PLD3	phospholipase D family, member 3	1
PLD2	phospholipase D2	1
BCR	breakpoint cluster region	3
VANGL1	vang-like 1 (van gogh, Drosophila)	1
VANGL2	vang-like 2 (van gogh, Drosophila)	1
PPARGC1A	peroxisome proliferator-activated receptor gamma, coactivator 1 alpha	1
VTI1A	vesicle transport through interaction with t-SNAREs homolog 1A (yeast)	1
CCR7	chemokine (C-C motif) receptor 7	1
CD34	CD34 molecule	1
UBR5	ubiquitin protein ligase E3 component n-recognin 5	2
ACAP2	ArfGAP with coiled-coil, ankyrin repeat and PH domains 2	2
CDK5R1	cyclin-dependent kinase 5, regulatory subunit 1 (p35)	1
EPHB3	EPH receptor B3	2
OCRL	oculocerebrorenal syndrome of Lowe	1
EPHB4	EPH receptor B4	2
EPHB2	EPH receptor B2	2
SEMA5A	sema domain, seven thrombospondin repeats (type 1 and type 1-like), transmembrane domain (TM) and short cytoplasmic domain, (semaphorin) 5A	2
SLC11A1	solute carrier family 11 (proton-coupled divalent metal ion transporters), member 1	2
ACE	angiotensin I converting enzyme (peptidyl-dipeptidase A) 1	1
KRAS	v-Ki-ras2 Kirsten rat sarcoma viral oncogene homolog	1
STX17	syntaxin 17	2
HIP1	huntingtin interacting protein 1	1
MAML1	mastermind-like 1 (Drosophila)	1
FBXO2	F-box protein 2	1
NTRK3	neurotrophic tyrosine kinase, receptor, type 3	3
SEMA6A	sema domain, transmembrane domain (TM), and cytoplasmic domain, (semaphorin) 6A	1
EPHA4	EPH receptor A4	2
SEMA6B	sema domain, transmembrane domain (TM), and cytoplasmic domain, (semaphorin) 6B	1
EPHA7	EPH receptor A7	1
SEMA6D	sema domain, transmembrane domain (TM), and cytoplasmic domain, (semaphorin) 6D	1
ATP2A2	ATPase, Ca++ transporting, cardiac muscle, slow twitch 2	3
RABEP1	rabaptin, RAB GTPase binding effector protein 1	1
RNF5	ring finger protein 5, E3 ubiquitin protein ligase	1
EPHA8	EPH receptor A8	1
NTRK2	neurotrophic tyrosine kinase, receptor, type 2	2
GOSR2	golgi SNAP receptor complex member 2	1
GOSR1	golgi SNAP receptor complex member 1	1
NCOR1	nuclear receptor corepressor 1	2
NCOR2	nuclear receptor corepressor 2	1
PPARA	peroxisome proliferator-activated receptor alpha	4
COL21A1	collagen, type XXI, alpha 1	1
RAB5B	RAB5B, member RAS oncogene family	3
TOLLIP	toll interacting protein	2
ZMAT3	zinc finger, matrin-type 3	3
PPARG	peroxisome proliferator-activated receptor gamma	1
GJA1	gap junction protein, alpha 1, 43kDa	1
VPS37C	vacuolar protein sorting 37 homolog C (S. cerevisiae)	1
KCNJ10	potassium inwardly-rectifying channel, subfamily J, member 10	1
ZEB1	zinc finger E-box binding homeobox 1	1
VPS37D	vacuolar protein sorting 37 homolog D (S. cerevisiae)	1
CPEB1	cytoplasmic polyadenylation element binding protein 1	2
KCNJ12	potassium inwardly-rectifying channel, subfamily J, member 12	1
RFXANK	regulatory factor X-associated ankyrin-containing protein	1
AGPAT6	1-acylglycerol-3-phosphate O-acyltransferase 6 (lysophosphatidic acid acyltransferase, zeta)	1
PDPK1	3-phosphoinositide dependent protein kinase-1	2
SEMA3D	sema domain, immunoglobulin domain (Ig), short basic domain, secreted, (semaphorin) 3D	1
SEMA3A	sema domain, immunoglobulin domain (Ig), short basic domain, secreted, (semaphorin) 3A	1
AGPAT4	1-acylglycerol-3-phosphate O-acyltransferase 4 (lysophosphatidic acid acyltransferase, delta)	1
AGAP2	ArfGAP with GTPase domain, ankyrin repeat and PH domain 2	2
AGAP3	ArfGAP with GTPase domain, ankyrin repeat and PH domain 3	1
STX1B	syntaxin 1B	1
RAB11FIP4	RAB11 family interacting protein 4 (class II)	5
RAB11FIP5	RAB11 family interacting protein 5 (class I)	3
GRM2	glutamate receptor, metabotropic 2	1
SEMA4G	sema domain, immunoglobulin domain (Ig), transmembrane domain (TM) and short cytoplasmic domain, (semaphorin) 4G	3
SEMA4F	sema domain, immunoglobulin domain (Ig), transmembrane domain (TM) and short cytoplasmic domain, (semaphorin) 4F	1
TGDS	TDP-glucose 4,6-dehydratase	2
SLC26A9	solute carrier family 26, member 9	1
PTGDR	prostaglandin D2 receptor (DP)	2
SEMA4C	sema domain, immunoglobulin domain (Ig), transmembrane domain (TM) and short cytoplasmic domain, (semaphorin) 4C	2
PLA2G6	phospholipase A2, group VI (cytosolic, calcium-independent)	2
MAP3K14	mitogen-activated protein kinase kinase kinase 14	2
PLA2G3	phospholipase A2, group III	1
RAB11FIP1	RAB11 family interacting protein 1 (class I)	2
MAP3K12	mitogen-activated protein kinase kinase kinase 12	2
MAP3K11	mitogen-activated protein kinase kinase kinase 11	2
KLC2	kinesin light chain 2	1
NEO1	neogenin 1	1
CYP27B1	cytochrome P450, family 27, subfamily B, polypeptide 1	1
ETV1	ets variant 1	3
PRKAA2	protein kinase, AMP-activated, alpha 2 catalytic subunit	1
ETV6	ets variant 6	1
MLLT4	myeloid/lymphoid or mixed-lineage leukemia (trithorax homolog, Drosophila); translocated to, 4	2
CD28	CD28 molecule	1
CSNK1A1	casein kinase 1, alpha 1	1
PLA2G15	phospholipase A2, group XV	1
YWHAB	tyrosine 3-monooxygenase/tryptophan 5-monooxygenase activation protein, beta polypeptide	1
NLGN3	neuroligin 3	1
SNAI1	snail homolog 1 (Drosophila)	1
GRIA1	glutamate receptor, ionotropic, AMPA 1	1
AP2A1	adaptor-related protein complex 2, alpha 1 subunit	1
MBOAT1	membrane bound O-acyltransferase domain containing 1	1
PTCH1	patched 1	1
SEPT2	septin 2	2
PLXNA1	plexin A1	3
PDGFA	platelet-derived growth factor alpha polypeptide	1
CASK	calcium/calmodulin-dependent serine protein kinase (MAGUK family)	1
FOXO1	forkhead box O1	1
VIPR1	vasoactive intestinal peptide receptor 1	1
MMP2	matrix metallopeptidase 2 (gelatinase A, 72kDa gelatinase, 72kDa type IV collagenase)	2
WNT1	wingless-type MMTV integration site family, member 1	1
RAD21	RAD21 homolog (S. pombe)	1
CLP1	CLP1, cleavage and polyadenylation factor I subunit, homolog (S. cerevisiae)	1
PRKACA	protein kinase, cAMP-dependent, catalytic, alpha	2
ITCH	itchy E3 ubiquitin protein ligase	3
CSNK1G1	casein kinase 1, gamma 1	3
DTX3L	deltex 3-like (Drosophila)	1
PRKAB2	protein kinase, AMP-activated, beta 2 non-catalytic subunit	2
SEPT6	septin 6	3
SEPT9	septin 9	1
CAV3	caveolin 3	1
FGFR1	fibroblast growth factor receptor 1	1
CAV1	caveolin 1, caveolae protein, 22kDa	1
PLXNC1	plexin C1	2
SSH1	slingshot homolog 1 (Drosophila)	2
DIAPH1	diaphanous homolog 1 (Drosophila)	2
ADCYAP1R1	adenylate cyclase activating polypeptide 1 (pituitary) receptor type I	1
SSH2	slingshot homolog 2 (Drosophila)	3
ITGB3	integrin, beta 3 (platelet glycoprotein IIIa, antigen CD61)	3
RRAGD	Ras-related GTP binding D	4
IRAK4	interleukin-1 receptor-associated kinase 4	2
ITGB8	integrin, beta 8	6
ITGAV	integrin, alpha V (vitronectin receptor, alpha polypeptide, antigen CD51)	1
RHOBTB2	Rho-related BTB domain containing 2	1
CSF1R	colony stimulating factor 1 receptor	1
CYP19A1	cytochrome P450, family 19, subfamily A, polypeptide 1	2
GABRA1	gamma-aminobutyric acid (GABA) A receptor, alpha 1	1
GABRA3	gamma-aminobutyric acid (GABA) A receptor, alpha 3	1
AK1	adenylate kinase 1	1
ITGA3	integrin, alpha 3 (antigen CD49C, alpha 3 subunit of VLA-3 receptor)	1
BRCA1	breast cancer 1, early onset	1
PPIF	peptidylprolyl isomerase F	1
NEDD4	neural precursor cell expressed, developmentally down-regulated 4, E3 ubiquitin protein ligase	1
ITGA5	integrin, alpha 5 (fibronectin receptor, alpha polypeptide)	4
ULK2	unc-51-like kinase 2 (C. elegans)	2
CHRD	chordin	1
PIP4K2C	phosphatidylinositol-5-phosphate 4-kinase, type II, gamma	2
PIP4K2B	phosphatidylinositol-5-phosphate 4-kinase, type II, beta	1
GM2A	GM2 ganglioside activator	1
AMT	aminomethyltransferase	1
MRVI1	murine retrovirus integration site 1 homolog	1
GNRHR	gonadotropin-releasing hormone receptor	1
CXCR5	chemokine (C-X-C motif) receptor 5	1
CHUK	conserved helix-loop-helix ubiquitous kinase	1
IRAK2	interleukin-1 receptor-associated kinase 2	1
IRAK1	interleukin-1 receptor-associated kinase 1	1
ADIPOR2	adiponectin receptor 2	2
PRKCE	protein kinase C, epsilon	1
PRKCB	protein kinase C, beta	3
CHST1	carbohydrate (keratan sulfate Gal-6) sulfotransferase 1	2
UBE2N	ubiquitin-conjugating enzyme E2N	1
OSM	oncostatin M	2
CD86	CD86 molecule	2
EYA1	eyes absent homolog 1 (Drosophila)	1
CFL2	cofilin 2 (muscle)	3
CD81	CD81 molecule	1
CFL1	cofilin 1 (non-muscle)	1
UBE2W	ubiquitin-conjugating enzyme E2W (putative)	2
MDM4	Mdm4 p53 binding protein homolog (mouse)	2
NGFR	nerve growth factor receptor	2
UBE2Z	ubiquitin-conjugating enzyme E2Z	1
XIAP	X-linked inhibitor of apoptosis	3
CAMK2G	calcium/calmodulin-dependent protein kinase II gamma	1
HCFC1	host cell factor C1 (VP16-accessory protein)	1
UBE3C	ubiquitin protein ligase E3C	3
MAP3K3	mitogen-activated protein kinase kinase kinase 3	1
MAP3K2	mitogen-activated protein kinase kinase kinase 2	2
MAP3K1	mitogen-activated protein kinase kinase kinase 1, E3 ubiquitin protein ligase	2
TAP1	transporter 1, ATP-binding cassette, sub-family B (MDR/TAP)	1
PIKFYVE	phosphoinositide kinase, FYVE finger containing	1
CAMK2D	calcium/calmodulin-dependent protein kinase II delta	1
NFAT5	nuclear factor of activated T-cells 5, tonicity-responsive	3
ETNK1	ethanolamine kinase 1	1
IL2RG	interleukin 2 receptor, gamma	1
CAMK2B	calcium/calmodulin-dependent protein kinase II beta	1
PIK3R5	phosphoinositide-3-kinase, regulatory subunit 5	1
PIK3R3	phosphoinositide-3-kinase, regulatory subunit 3 (gamma)	1
CAMK2A	calcium/calmodulin-dependent protein kinase II alpha	2
PPAP2B	phosphatidic acid phosphatase type 2B	1
APC	adenomatous polyposis coli	2
DLST	dihydrolipoamide S-succinyltransferase (E2 component of 2-oxo-glutarate complex)	1
IL2RB	interleukin 2 receptor, beta	1
KAT2B	K(lysine) acetyltransferase 2B	2
NFASC	neurofascin	4
SIRT1	sirtuin 1	1
RALGDS	ral guanine nucleotide dissociation stimulator	1
GSPT1	G1 to S phase transition 1	2
PRLR	prolactin receptor	3
IRF1	interferon regulatory factor 1	3
WDR82	WD repeat domain 82	5
ERO1LB	ERO1-like beta (S. cerevisiae)	2
FAS	Fas (TNF receptor superfamily, member 6)	1
GNG5	guanine nucleotide binding protein (G protein), gamma 5	1
MAP2K7	mitogen-activated protein kinase kinase 7	1
HTR1E	5-hydroxytryptamine (serotonin) receptor 1E, G protein-coupled	1
SKP1	S-phase kinase-associated protein 1	1
SIRPA	signal-regulatory protein alpha	2
PCLO	piccolo (presynaptic cytomatrix protein)	2
BCL2L11	BCL2-like 11 (apoptosis facilitator)	5
NME6	non-metastatic cells 6, protein expressed in (nucleoside-diphosphate kinase)	1
NME4	non-metastatic cells 4, protein expressed in	3
NAPEPLD	N-acyl phosphatidylethanolamine phospholipase D	2
EIF2S1	eukaryotic translation initiation factor 2, subunit 1 alpha, 35kDa	2
ERBB4	v-erb-a erythroblastic leukemia viral oncogene homolog 4 (avian)	1
GNAI2	guanine nucleotide binding protein (G protein), alpha inhibiting activity polypeptide 2	3
ERBB3	v-erb-b2 erythroblastic leukemia viral oncogene homolog 3 (avian)	3
ACP2	acid phosphatase 2, lysosomal	1
ACP1	acid phosphatase 1, soluble	1
DAGLA	diacylglycerol lipase, alpha	5
PPP1R3B	protein phosphatase 1, regulatory subunit 3B	3
PVRL1	poliovirus receptor-related 1 (herpesvirus entry mediator C)	2
PVRL2	poliovirus receptor-related 2 (herpesvirus entry mediator B)	2
CACYBP	calcyclin binding protein	1
IQSEC1	IQ motif and Sec7 domain 1	2
IQSEC2	IQ motif and Sec7 domain 2	5
GIT1	G protein-coupled receptor kinase interacting ArfGAP 1	2
GPD2	glycerol-3-phosphate dehydrogenase 2 (mitochondrial)	2
DVL2	dishevelled, dsh homolog 2 (Drosophila)	1
DVL3	dishevelled, dsh homolog 3 (Drosophila)	1
DNMT3A	DNA (cytosine-5-)-methyltransferase 3 alpha	2
MGAT4A	mannosyl (alpha-1,3-)-glycoprotein beta-1,4-N-acetylglucosaminyltransferase, isozyme A	1
GPD1	glycerol-3-phosphate dehydrogenase 1 (soluble)	1
NPLOC4	nuclear protein localization 4 homolog (S. cerevisiae)	3
TCF7	transcription factor 7 (T-cell specific, HMG-box)	1
NDUFA4L2	NADH dehydrogenase (ubiquinone) 1 alpha subcomplex, 4-like 2	1
TGFBR1	transforming growth factor, beta receptor 1	1
MAP2K4	mitogen-activated protein kinase kinase 4	1
KCNK2	potassium channel, subfamily K, member 2	1
UPF3A	UPF3 regulator of nonsense transcripts homolog A (yeast)	2
H3F3B	H3 histone, family 3B (H3.3B)	1
CHRNE	cholinergic receptor, nicotinic, epsilon (muscle)	2
SLC9A1	solute carrier family 9, subfamily A (NHE1, cation proton antiporter 1), member 1	1
AP3S2	adaptor-related protein complex 3, sigma 2 subunit	2
QARS	glutaminyl-tRNA synthetase	1
KCNK10	potassium channel, subfamily K, member 10	2
CCNE2	cyclin E2	1
XYLT1	xylosyltransferase I	2
MAPT	microtubule-associated protein tau	1
GUCY1A3	guanylate cyclase 1, soluble, alpha 3	2
TRPV6	transient receptor potential cation channel, subfamily V, member 6	2
WDR33	WD repeat domain 33	1
STX3	syntaxin 3	1
ARHGEF7	Rho guanine nucleotide exchange factor (GEF) 7	2
ARHGEF6	Rac/Cdc42 guanine nucleotide exchange factor (GEF) 6	1
EXOSC2	exosome component 2	1
PDE10A	phosphodiesterase 10A	1
FOSB	FBJ murine osteosarcoma viral oncogene homolog B	3
CCND1	cyclin D1	1
CCND2	cyclin D2	1
RRM2	ribonucleotide reductase M2	1
SRGAP3	SLIT-ROBO Rho GTPase activating protein 3	6
CYBRD1	cytochrome b reductase 1	3
GNB5	guanine nucleotide binding protein (G protein), beta 5	2
NSD1	nuclear receptor binding SET domain protein 1	1
SRGAP1	SLIT-ROBO Rho GTPase activating protein 1	3
CLOCK	clock homolog (mouse)	1
ALPL	alkaline phosphatase, liver/bone/kidney	1
NKD1	naked cuticle homolog 1 (Drosophila)	2
MFSD8	major facilitator superfamily domain containing 8	2
PML	promyelocytic leukemia	1
GNG12	guanine nucleotide binding protein (G protein), gamma 12	1
DGKA	diacylglycerol kinase, alpha 80kDa	1
NAGPA	N-acetylglucosamine-1-phosphodiester alpha-N-acetylglucosaminidase	1
GALNT10	UDP-N-acetyl-alpha-D-galactosamine:polypeptide N-acetylgalactosaminyltransferase 10 (GalNAc-T10)	2
HPSE2	heparanase 2	1
DGKE	diacylglycerol kinase, epsilon 64kDa	1
PDE1B	phosphodiesterase 1B, calmodulin-dependent	4
PPP2CB	protein phosphatase 2, catalytic subunit, beta isozyme	1
RAB11B	RAB11B, member RAS oncogene family	1
LIMD1	LIM domains containing 1	2
PER3	period homolog 3 (Drosophila)	1
FBXW11	F-box and WD repeat domain containing 11	1
RASA1	RAS p21 protein activator (GTPase activating protein) 1	1
TMPRSS2	transmembrane protease, serine 2	2
DNM3	dynamin 3	1
COL15A1	collagen, type XV, alpha 1	1
FADS2	fatty acid desaturase 2	1
PDE3A	phosphodiesterase 3A, cGMP-inhibited	1
RICTOR	RPTOR independent companion of MTOR, complex 2	2
CAPN1	calpain 1, (mu/I) large subunit	1
RPS6KA5	ribosomal protein S6 kinase, 90kDa, polypeptide 5	2
DOT1L	DOT1-like, histone H3 methyltransferase (S. cerevisiae)	1
RPS6KA3	ribosomal protein S6 kinase, 90kDa, polypeptide 3	4
RPS6KA2	ribosomal protein S6 kinase, 90kDa, polypeptide 2	2
DGKZ	diacylglycerol kinase, zeta	2
HBEGF	heparin-binding EGF-like growth factor	3
CTNS	cystinosin, lysosomal cystine transporter	1
HTR2C	5-hydroxytryptamine (serotonin) receptor 2C, G protein-coupled	1
DNM2	dynamin 2	2
RNASEL	ribonuclease L (2',5'-oligoisoadenylate synthetase-dependent)	1
RNMT	RNA (guanine-7-) methyltransferase	2
CNOT8	CCR4-NOT transcription complex, subunit 8	1
CNOT3	CCR4-NOT transcription complex, subunit 3	1
JAG2	jagged 2	1
CNOT2	CCR4-NOT transcription complex, subunit 2	1
PDE3B	phosphodiesterase 3B, cGMP-inhibited	1
TNFSF13	tumor necrosis factor (ligand) superfamily, member 13	1
RPS6KB1	ribosomal protein S6 kinase, 70kDa, polypeptide 1	1
CNOT6	CCR4-NOT transcription complex, subunit 6	1
CNOT4	CCR4-NOT transcription complex, subunit 4	2
VCL	vinculin	1
ANK1	ankyrin 1, erythrocytic	1
SLC2A4	solute carrier family 2 (facilitated glucose transporter), member 4	2
UNC5B	unc-5 homolog B (C. elegans)	1
ANK2	ankyrin 2, neuronal	1
ANK3	ankyrin 3, node of Ranvier (ankyrin G)	1
UNC5A	unc-5 homolog A (C. elegans)	2
PDE4A	phosphodiesterase 4A, cAMP-specific	1
SLC2A1	solute carrier family 2 (facilitated glucose transporter), member 1	3
PDE4B	phosphodiesterase 4B, cAMP-specific	2
SAR1B	SAR1 homolog B (S. cerevisiae)	1
INSR	insulin receptor	2
HMGCL	3-hydroxymethyl-3-methylglutaryl-CoA lyase	1
EGFR	epidermal growth factor receptor	1
RET	ret proto-oncogene	1
IRS2	insulin receptor substrate 2	4
RBL2	retinoblastoma-like 2 (p130)	2
PSD3	pleckstrin and Sec7 domain containing 3	1
PISD	phosphatidylserine decarboxylase	1
IRS1	insulin receptor substrate 1	3
WEE1	WEE1 homolog (S. pombe)	2
EARS2	glutamyl-tRNA synthetase 2, mitochondrial (putative)	1
DDIT4	DNA-damage-inducible transcript 4	1
RASGRF1	Ras protein-specific guanine nucleotide-releasing factor 1	1
DLL4	delta-like 4 (Drosophila)	1
LCLAT1	lysocardiolipin acyltransferase 1	1
COL1A1	collagen, type I, alpha 1	1
XRN1	5'-3' exoribonuclease 1	1
SLC40A1	solute carrier family 40 (iron-regulated transporter), member 1	2
MAVS	mitochondrial antiviral signaling protein	1
STX7	syntaxin 7	1
STK11	serine/threonine kinase 11	1
MRAS	muscle RAS oncogene homolog	1
CX3CL1	chemokine (C-X3-C motif) ligand 1	1
SESN2	sestrin 2	1
PYDC1	PYD (pyrin domain) containing 1	1
TIMP3	TIMP metallopeptidase inhibitor 3	1
VDR	vitamin D (1,25- dihydroxyvitamin D3) receptor	1
DDX3X	DEAD (Asp-Glu-Ala-Asp) box polypeptide 3, X-linked	1
CRB2	crumbs homolog 2 (Drosophila)	1
PCYT1B	phosphate cytidylyltransferase 1, choline, beta	4
TRAF6	TNF receptor-associated factor 6, E3 ubiquitin protein ligase	1
B4GALT3	UDP-Gal:betaGlcNAc beta 1,4- galactosyltransferase, polypeptide 3	1
VAV3	vav 3 guanine nucleotide exchange factor	3
EPB41	erythrocyte membrane protein band 4.1 (elliptocytosis 1, RH-linked)	1
SMG6	smg-6 homolog, nonsense mediated mRNA decay factor (C. elegans)	1
SMG5	smg-5 homolog, nonsense mediated mRNA decay factor (C. elegans)	2
CACNA1I	calcium channel, voltage-dependent, T type, alpha 1I subunit	1
SUV39H1	suppressor of variegation 3-9 homolog 1 (Drosophila)	1
SMG1	smg-1 homolog, phosphatidylinositol 3-kinase-related kinase (C. elegans)	1
WHSC1	Wolf-Hirschhorn syndrome candidate 1	3
PDE6G	phosphodiesterase 6G, cGMP-specific, rod, gamma	1
SHANK2	SH3 and multiple ankyrin repeat domains 2	5
SHANK3	SH3 and multiple ankyrin repeat domains 3	1
LAT	linker for activation of T cells	1
PDE7B	phosphodiesterase 7B	1
B3GAT3	beta-1,3-glucuronyltransferase 3 (glucuronosyltransferase I)	1
TSC1	tuberous sclerosis 1	2
VCP	valosin containing protein	1
CACNA1C	calcium channel, voltage-dependent, L type, alpha 1C subunit	1
SEL1L	sel-1 suppressor of lin-12-like (C. elegans)	1
ACOX1	acyl-CoA oxidase 1, palmitoyl	1
NDST3	N-deacetylase/N-sulfotransferase (heparan glucosaminyl) 3	2
KDM6A	lysine (K)-specific demethylase 6A	1
SEC24A	SEC24 family, member A (S. cerevisiae)	2
FOSL2	FOS-like antigen 2	2
NDST1	N-deacetylase/N-sulfotransferase (heparan glucosaminyl) 1	1
PIP5K1C	phosphatidylinositol-4-phosphate 5-kinase, type I, gamma	1
ZFYVE20	zinc finger, FYVE domain containing 20	3
ALG9	asparagine-linked glycosylation 9, alpha-1,2-mannosyltransferase homolog (S. cerevisiae)	2
DES	desmin	1
FRMD6	FERM domain containing 6	1
ZFYVE16	zinc finger, FYVE domain containing 16	4
DLG3	discs, large homolog 3 (Drosophila)	1
PDE8B	phosphodiesterase 8B	1
YOD1	YOD1 OTU deubiquinating enzyme 1 homolog (S. cerevisiae)	4
SEC24C	SEC24 family, member C (S. cerevisiae)	2
IPMK	inositol polyphosphate multikinase	2
TRPM6	transient receptor potential cation channel, subfamily M, member 6	2
SGK1	serum/glucocorticoid regulated kinase 1	2
LIMK2	LIM domain kinase 2	3
TRPM7	transient receptor potential cation channel, subfamily M, member 7	1
ESR1	estrogen receptor 1	1
CDK6	cyclin-dependent kinase 6	2
HMGA2	high mobility group AT-hook 2	4
LPIN2	lipin 2	1
SLC9A3R2	solute carrier family 9, subfamily A (NHE3, cation proton antiporter 3), member 3 regulator 2	1
LPIN1	lipin 1	1
M6PR	mannose-6-phosphate receptor (cation dependent)	2
CHRM1	cholinergic receptor, muscarinic 1	2
RRAS2	related RAS viral (r-ras) oncogene homolog 2	1
GPAM	glycerol-3-phosphate acyltransferase, mitochondrial	1
ACVR1	activin A receptor, type I	1
GALNT3	UDP-N-acetyl-alpha-D-galactosamine:polypeptide N-acetylgalactosaminyltransferase 3 (GalNAc-T3)	1
GALNT2	UDP-N-acetyl-alpha-D-galactosamine:polypeptide N-acetylgalactosaminyltransferase 2 (GalNAc-T2)	2
NUP98	nucleoporin 98kDa	1
GALNT1	UDP-N-acetyl-alpha-D-galactosamine:polypeptide N-acetylgalactosaminyltransferase 1 (GalNAc-T1)	2
GALNT7	UDP-N-acetyl-alpha-D-galactosamine:polypeptide N-acetylgalactosaminyltransferase 7 (GalNAc-T7)	1
CTF1	cardiotrophin 1	1
PPM1A	protein phosphatase, Mg2+/Mn2+ dependent, 1A	3
KITLG	KIT ligand	1
RDX	radixin	2
NR3C1	nuclear receptor subfamily 3, group C, member 1 (glucocorticoid receptor)	1
NFYA	nuclear transcription factor Y, alpha	1
SEC62	SEC62 homolog (S. cerevisiae)	1
CDH5	cadherin 5, type 2 (vascular endothelium)	1
IGF1R	insulin-like growth factor 1 receptor	3
INPP5K	inositol polyphosphate-5-phosphatase K	1
PLEKHO2	pleckstrin homology domain containing, family O member 2	3
PAFAH1B1	platelet-activating factor acetylhydrolase 1b, regulatory subunit 1 (45kDa)	1
PAFAH1B2	platelet-activating factor acetylhydrolase 1b, catalytic subunit 2 (30kDa)	2
NEDD4L	neural precursor cell expressed, developmentally down-regulated 4-like, E3 ubiquitin protein ligase	3
SH2B1	SH2B adaptor protein 1	1
B4GALNT1	beta-1,4-N-acetyl-galactosaminyl transferase 1	1
COL4A4	collagen, type IV, alpha 4	1
COL4A2	collagen, type IV, alpha 2	2
FLT1	fms-related tyrosine kinase 1 (vascular endothelial growth factor/vascular permeability factor receptor)	3
GNAO1	guanine nucleotide binding protein (G protein), alpha activating activity polypeptide O	2
SLC12A2	solute carrier family 12 (sodium/potassium/chloride transporters), member 2	1
NF2	neurofibromin 2 (merlin)	2
CYP21A2	cytochrome P450, family 21, subfamily A, polypeptide 2	1
CREB1	cAMP responsive element binding protein 1	3
NF1	neurofibromin 1	2
SLC12A5	solute carrier family 12 (potassium/chloride transporter), member 5	1
DPYSL5	dihydropyrimidinase-like 5	5
DPYSL2	dihydropyrimidinase-like 2	2
CDC25A	cell division cycle 25 homolog A (S. pombe)	1
COL4A6	collagen, type IV, alpha 6	1
CDC25B	cell division cycle 25 homolog B (S. pombe)	1
RDH10	retinol dehydrogenase 10 (all-trans)	2
JAK1	Janus kinase 1	2
GGA1	golgi-associated, gamma adaptin ear containing, ARF binding protein 1	1
MBTPS1	membrane-bound transcription factor peptidase, site 1	1
ADCY3	adenylate cyclase 3	1
SLC36A1	solute carrier family 36 (proton/amino acid symporter), member 1	1
ATP1B1	ATPase, Na+/K+ transporting, beta 1 polypeptide	1
SEC31B	SEC31 homolog B (S. cerevisiae)	1
ADCY1	adenylate cyclase 1 (brain)	1
DYNC1LI2	dynein, cytoplasmic 1, light intermediate chain 2	2
VAPA	VAMP (vesicle-associated membrane protein)-associated protein A, 33kDa	1
ATP1B2	ATPase, Na+/K+ transporting, beta 2 polypeptide	1
CHMP7	charged multivesicular body protein 7	1
SNCA	synuclein, alpha (non A4 component of amyloid precursor)	1
EFNA3	ephrin-A3	1
ADCY6	adenylate cyclase 6	2
S1PR2	sphingosine-1-phosphate receptor 2	1
BDNF	brain-derived neurotrophic factor	1
S1PR1	sphingosine-1-phosphate receptor 1	2
CRY2	cryptochrome 2 (photolyase-like)	2
SIN3A	SIN3 transcription regulator homolog A (yeast)	1
GAB2	GRB2-associated binding protein 2	2
AGPS	alkylglycerone phosphate synthase	1
GAB1	GRB2-associated binding protein 1	3
RARA	retinoic acid receptor, alpha	2
RAPGEF2	Rap guanine nucleotide exchange factor (GEF) 2	1
PAN2	PAN2 poly(A) specific ribonuclease subunit homolog (S. cerevisiae)	1
CRLS1	cardiolipin synthase 1	1
EFNB1	ephrin-B1	2
PIM1	pim-1 oncogene	1
HTR4	5-hydroxytryptamine (serotonin) receptor 4, G protein-coupled	2
ABCC10	ATP-binding cassette, sub-family C (CFTR/MRP), member 10	2
SUV420H2	suppressor of variegation 4-20 homolog 2 (Drosophila)	1
MGAT3	mannosyl (beta-1,4-)-glycoprotein beta-1,4-N-acetylglucosaminyltransferase	2
PDGFRA	platelet-derived growth factor receptor, alpha polypeptide	2
EFNA5	ephrin-A5	1
LAMC1	laminin, gamma 1 (formerly LAMB2)	1
SUV420H1	suppressor of variegation 4-20 homolog 1 (Drosophila)	1
GCNT2	glucosaminyl (N-acetyl) transferase 2, I-branching enzyme (I blood group)	1
PFKFB4	6-phosphofructo-2-kinase/fructose-2,6-biphosphatase 4	1
ENPP1	ectonucleotide pyrophosphatase/phosphodiesterase 1	1
PFKFB2	6-phosphofructo-2-kinase/fructose-2,6-biphosphatase 2	1
ADRBK2	adrenergic, beta, receptor kinase 2	1
ITGA10	integrin, alpha 10	1
ADRBK1	adrenergic, beta, receptor kinase 1	1
CDC34	cell division cycle 34 homolog (S. cerevisiae)	2
PXN	paxillin	1
LIF	leukemia inhibitory factor	2
THTPA	thiamine triphosphatase	1
SCD	stearoyl-CoA desaturase (delta-9-desaturase)	1
SMAD5	SMAD family member 5	3
SMAD4	SMAD family member 4	1
SMAD3	SMAD family member 3	1
SMAD2	SMAD family member 2	1
NOTCH3	notch 3	1
NOTCH2	notch 2	1
HYOU1	hypoxia up-regulated 1	1
NOTCH1	notch 1	1
SFRP1	secreted frizzled-related protein 1	1
DCP2	DCP2 decapping enzyme homolog (S. cerevisiae)	1
DCP1A	DCP1 decapping enzyme homolog A (S. cerevisiae)	3
CHRNB2	cholinergic receptor, nicotinic, beta 2 (neuronal)	1
CCNT2	cyclin T2	1
WASF3	WAS protein family, member 3	1
SLC16A10	solute carrier family 16, member 10 (aromatic amino acid transporter)	1
CAMKK1	calcium/calmodulin-dependent protein kinase kinase 1, alpha	2
CANT1	calcium activated nucleotidase 1	2
RNGTT	RNA guanylyltransferase and 5'-phosphatase	1
CAMKK2	calcium/calmodulin-dependent protein kinase kinase 2, beta	1
EDNRA	endothelin receptor type A	1
BAG2	BCL2-associated athanogene 2	1
NOS3	nitric oxide synthase 3 (endothelial cell)	1
COL11A2	collagen, type XI, alpha 2	2
LPGAT1	lysophosphatidylglycerol acyltransferase 1	1
RXFP2	relaxin/insulin-like family peptide receptor 2	1
HERC2	HECT and RLD domain containing E3 ubiquitin protein ligase 2	1
CDS1	CDP-diacylglycerol synthase (phosphatidate cytidylyltransferase) 1	2
SLIT1	slit homolog 1 (Drosophila)	2
PSEN1	presenilin 1	3
MED8	mediator complex subunit 8	1
BCAT1	branched chain amino-acid transaminase 1, cytosolic	2
POLR2F	polymerase (RNA) II (DNA directed) polypeptide F	1
USP8	ubiquitin specific peptidase 8	1
CLDN19	claudin 19	1
AASS	aminoadipate-semialdehyde synthase	1
COX7A2L	cytochrome c oxidase subunit VIIa polypeptide 2 like	2
SFN	stratifin	1
POLR2D	polymerase (RNA) II (DNA directed) polypeptide D	2
SUFU	suppressor of fused homolog (Drosophila)	3
NXT2	nuclear transport factor 2-like export factor 2	3
STAT6	signal transducer and activator of transcription 6, interleukin-4 induced	1
GNPTAB	N-acetylglucosamine-1-phosphate transferase, alpha and beta subunits	2
THBS1	thrombospondin 1	2
POLR3G	polymerase (RNA) III (DNA directed) polypeptide G (32kD)	2
RRBP1	ribosome binding protein 1 homolog 180kDa (dog)	1
NLK	nemo-like kinase	1
FZD3	frizzled family receptor 3	2
ATP1A2	ATPase, Na+/K+ transporting, alpha 2 polypeptide	2
AFF1	AF4/FMR2 family, member 1	2
FZD4	frizzled family receptor 4	3
STAT3	signal transducer and activator of transcription 3 (acute-phase response factor)	2
POLR3D	polymerase (RNA) III (DNA directed) polypeptide D, 44kDa	1
STAT2	signal transducer and activator of transcription 2, 113kDa	1
ABCC9	ATP-binding cassette, sub-family C (CFTR/MRP), member 9	1
PAPOLA	poly(A) polymerase alpha	2
ADCY9	adenylate cyclase 9	1
MAPK13	mitogen-activated protein kinase 13	1
MAPK14	mitogen-activated protein kinase 14	1
CALM3	calmodulin 3 (phosphorylase kinase, delta)	1
PBX1	pre-B-cell leukemia homeobox 1	1
PBX3	pre-B-cell leukemia homeobox 3	2
BAMBI	BMP and activin membrane-bound inhibitor homolog (Xenopus laevis)	2
CALM2	calmodulin 2 (phosphorylase kinase, delta)	1
ABCC5	ATP-binding cassette, sub-family C (CFTR/MRP), member 5	2
TOB2	transducer of ERBB2, 2	2
TP53INP1	tumor protein p53 inducible nuclear protein 1	4
SLC6A1	solute carrier family 6 (neurotransmitter transporter, GABA), member 1	1
WFS1	Wolfram syndrome 1 (wolframin)	2
FGF14	fibroblast growth factor 14	1
SLC6A3	solute carrier family 6 (neurotransmitter transporter, dopamine), member 3	1
WNT3A	wingless-type MMTV integration site family, member 3A	1
FGF11	fibroblast growth factor 11	2
UBQLN4	ubiquilin 4	3
ITPKB	inositol-trisphosphate 3-kinase B	2
ITPKC	inositol-trisphosphate 3-kinase C	1
FAHD1	fumarylacetoacetate hydrolase domain containing 1	1
TIAM1	T-cell lymphoma invasion and metastasis 1	2
SPRED1	sprouty-related, EVH1 domain containing 1	2
SLC4A4	solute carrier family 4, sodium bicarbonate cotransporter, member 4	1
CIITA	class II, major histocompatibility complex, transactivator	1
SOCS4	suppressor of cytokine signaling 4	2
PPP1CC	protein phosphatase 1, catalytic subunit, gamma isozyme	1
STK4	serine/threonine kinase 4	1
NUMBL	numb homolog (Drosophila)-like	1
MAP4K3	mitogen-activated protein kinase kinase kinase kinase 3	2
GNS	glucosamine (N-acetyl)-6-sulfatase	4
SLC38A1	solute carrier family 38, member 1	1
COL24A1	collagen, type XXIV, alpha 1	1
SLC38A5	solute carrier family 38, member 5	1
SLC38A2	solute carrier family 38, member 2	1
TFAP4	transcription factor AP-4 (activating enhancer binding protein 4)	1
ELK1	ELK1, member of ETS oncogene family	3
CTSA	cathepsin A	2
DERL3	Der1-like domain family, member 3	1
SRC	v-src sarcoma (Schmidt-Ruppin A-2) viral oncogene homolog (avian)	1
LAPTM5	lysosomal protein transmembrane 5	2
B3GNT5	UDP-GlcNAc:betaGal beta-1,3-N-acetylglucosaminyltransferase 5	1
ELK4	ELK4, ETS-domain protein (SRF accessory protein 1)	2
CNOT6L	CCR4-NOT transcription complex, subunit 6-like	1
B3GNT7	UDP-GlcNAc:betaGal beta-1,3-N-acetylglucosaminyltransferase 7	2
GALC	galactosylceramidase	1
B3GNT1	UDP-GlcNAc:betaGal beta-1,3-N-acetylglucosaminyltransferase 1	1
GALE	UDP-galactose-4-epimerase	2
ENTPD4	ectonucleoside triphosphate diphosphohydrolase 4	2
ENTPD1	ectonucleoside triphosphate diphosphohydrolase 1	1
RUNX1	runt-related transcription factor 1	1
ENTPD2	ectonucleoside triphosphate diphosphohydrolase 2	1
AXIN1	axin 1	1
PARD6B	par-6 partitioning defective 6 homolog beta (C. elegans)	2
CKAP4	cytoskeleton-associated protein 4	1
TOMM40	translocase of outer mitochondrial membrane 40 homolog (yeast)	1
CASC3	cancer susceptibility candidate 3	1
PLCG1	phospholipase C, gamma 1	1
PRICKLE2	prickle homolog 2 (Drosophila)	1
SMC1A	structural maintenance of chromosomes 1A	2
BMI1	BMI1 polycomb ring finger oncogene	1
TLN1	talin 1	1
TLN2	talin 2	1
FASLG	Fas ligand (TNF superfamily, member 6)	1
ACVR1C	activin A receptor, type IC	1
ACVR1B	activin A receptor, type IB	3
KCNQ4	potassium voltage-gated channel, KQT-like subfamily, member 4	1
PLCB3	phospholipase C, beta 3 (phosphatidylinositol-specific)	1
MGLL	monoglyceride lipase	3
PAK1	p21 protein (Cdc42/Rac)-activated kinase 1	1
SV2A	synaptic vesicle glycoprotein 2A	1
KCNQ1	potassium voltage-gated channel, KQT-like subfamily, member 1	1
NSF	N-ethylmaleimide-sensitive factor	1
AKT2	v-akt murine thymoma viral oncogene homolog 2	2
PIGA	phosphatidylinositol glycan anchor biosynthesis, class A	3
EGR2	early growth response 2	1
RUNX1T1	runt-related transcription factor 1; translocated to, 1 (cyclin D-related)	1
DAPK2	death-associated protein kinase 2	2
MCM3	minichromosome maintenance complex component 3	2
DAPK1	death-associated protein kinase 1	1
ACVR2A	activin A receptor, type IIA	2
ACVR2B	activin A receptor, type IIB	2
ALDH7A1	aldehyde dehydrogenase 7 family, member A1	1
BTG2	BTG family, member 2	3
PSME3	proteasome (prosome, macropain) activator subunit 3 (PA28 gamma; Ki)	1
CTSB	cathepsin B	1
KPNA2	karyopherin alpha 2 (RAG cohort 1, importin alpha 1)	2
KPNA1	karyopherin alpha 1 (importin alpha 5)	1
CALCR	calcitonin receptor	2
SUPT3H	suppressor of Ty 3 homolog (S. cerevisiae)	1
PPP1R12B	protein phosphatase 1, regulatory subunit 12B	4
PPP3R1	protein phosphatase 3, regulatory subunit B, alpha	2
TPM1	tropomyosin 1 (alpha)	1
TCF7L1	transcription factor 7-like 1 (T-cell specific, HMG-box)	1
TPM3	tropomyosin 3	3
TNFRSF1B	tumor necrosis factor receptor superfamily, member 1B	2
MTHFR	methylenetetrahydrofolate reductase (NAD(P)H)	1
RASGRP3	RAS guanyl releasing protein 3 (calcium and DAG-regulated)	1
SH3GLB1	SH3-domain GRB2-like endophilin B1	1
PLCD3	phospholipase C, delta 3	1
MSI1	musashi homolog 1 (Drosophila)	1
DTX4	deltex homolog 4 (Drosophila)	2
NDUFA4	NADH dehydrogenase (ubiquinone) 1 alpha subcomplex, 4, 9kDa	1
SLC17A7	solute carrier family 17 (sodium-dependent inorganic phosphate cotransporter), member 7	1
KCNN4	potassium intermediate/small conductance calcium-activated channel, subfamily N, member 4	1
SLC17A6	solute carrier family 17 (sodium-dependent inorganic phosphate cotransporter), member 6	1
SP1	Sp1 transcription factor	3
SETD7	SET domain containing (lysine methyltransferase) 7	1
CRK	v-crk sarcoma virus CT10 oncogene homolog (avian)	2
